# Supplementary material for: Further orthometalated dinuclear palladium(iii) compounds with bridging N,S-donor ligands
Source: Royal Society of Chemistry journal article supplement (doi:10.1039/c3dt52717d), 2013-12-02
Supplement: c3dt52717d.pdf [file c3dt52717d.pdf]

Supplementary Information for the manuscript:

**Further Orthometalated Dinuclear Palladium(III) Compounds with  
Bridging N,S-Donor Ligands**

*Susana Ibáñez,<sup>a</sup> Doris Nena Vrečo,<sup>a</sup> Francisco Estevan,<sup>a</sup> Pipsa Hirva,<sup>b</sup> Mercedes Sanat<sup>a</sup> and  
M<sup>a</sup>Angeles Úbeda<sup>\*a</sup>*

<sup>a</sup>Departament de Química Inorgànica, Universitat de València, Dr.Moliner 50, 46100-Burjassot,  
Valencia, Spain

<sup>b</sup>Department of Chemistry, University of Eastern Finland, Joensuu Campus, P.O. Box 111, FI-  
80101 Joensuu, Finland

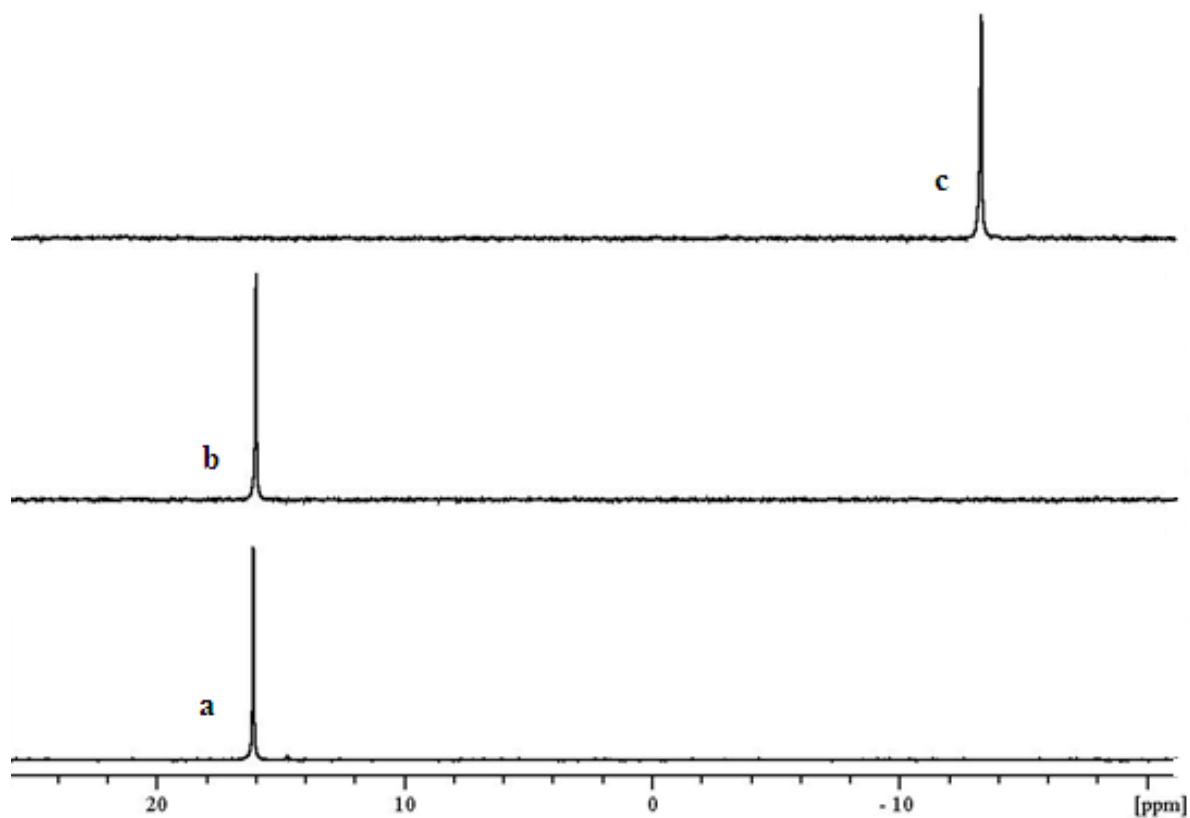

Figure S1.  $^{31}\text{P}$  NMR spectra of compound **2g** at 298K (a) and 200K (b).  $^{31}\text{P}$  NMR spectrum at 200 K of compound **3g** obtained by addition of  $\text{PhICl}_2$  to a solution of compound **2g** in  $\text{CD}_2\text{Cl}_2$  (c).

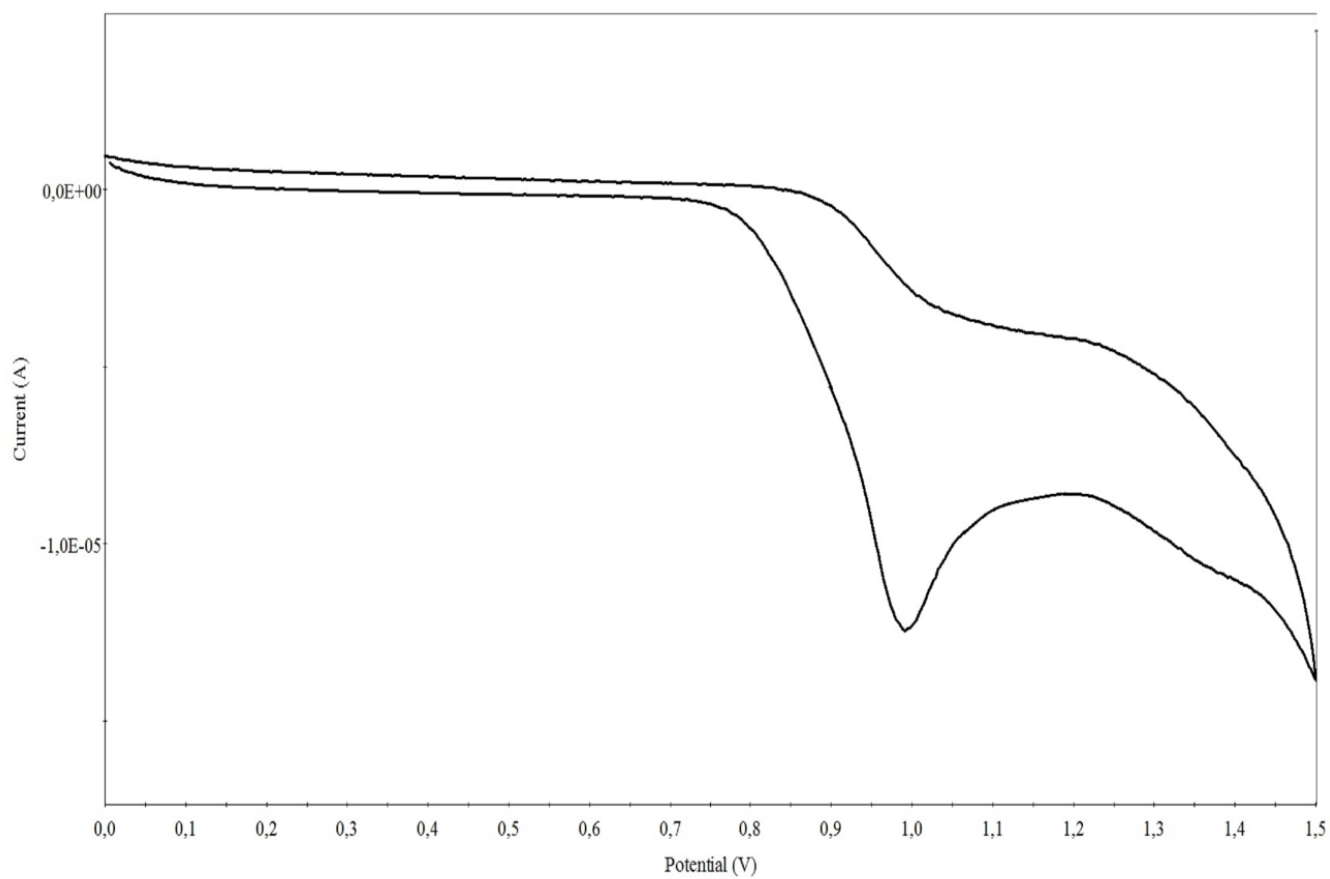

Figure S2. Cyclic voltammogram of compound **2f** in  $\text{CH}_2\text{Cl}_2$

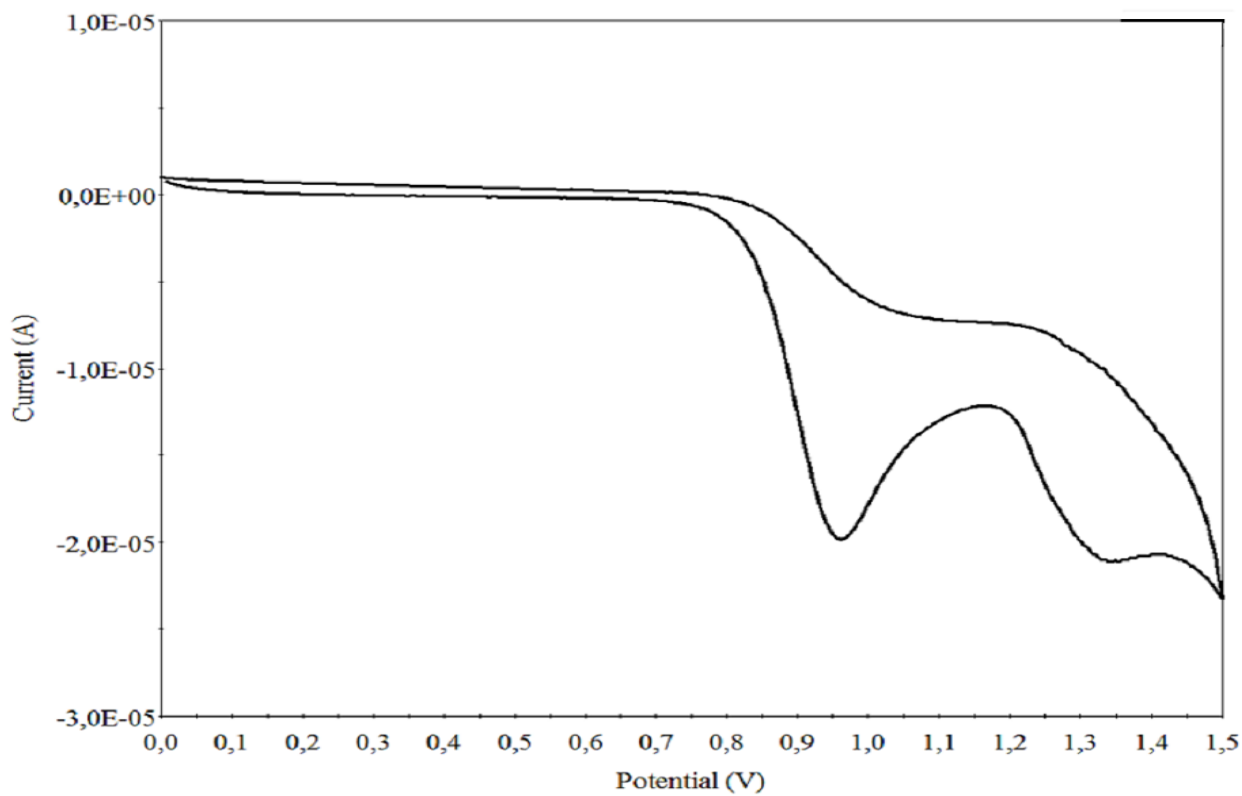

Figure S3. Cyclic voltammogram in  $\text{CH}_2\text{Cl}_2$   
of compound **2f** with the addition of 2 equivalents of TEACl

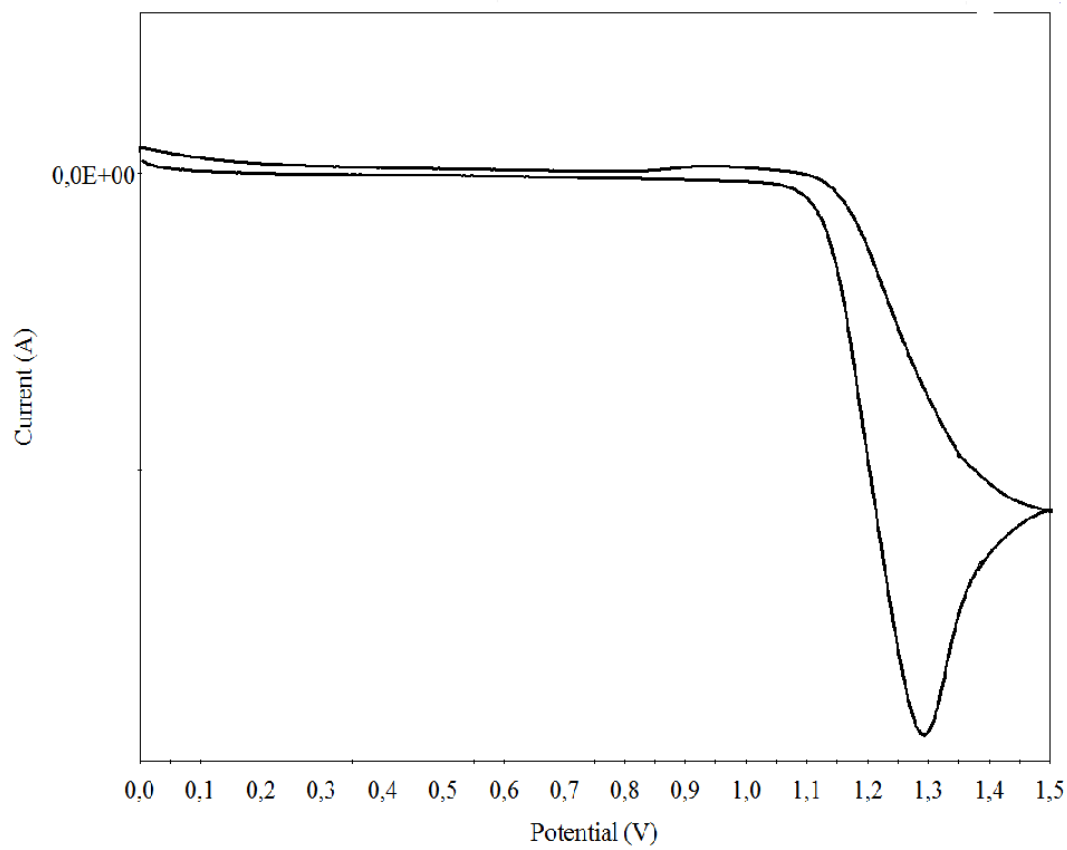

Figure S4. Cyclic voltammogram of TEACl in CH<sub>2</sub>Cl<sub>2</sub>

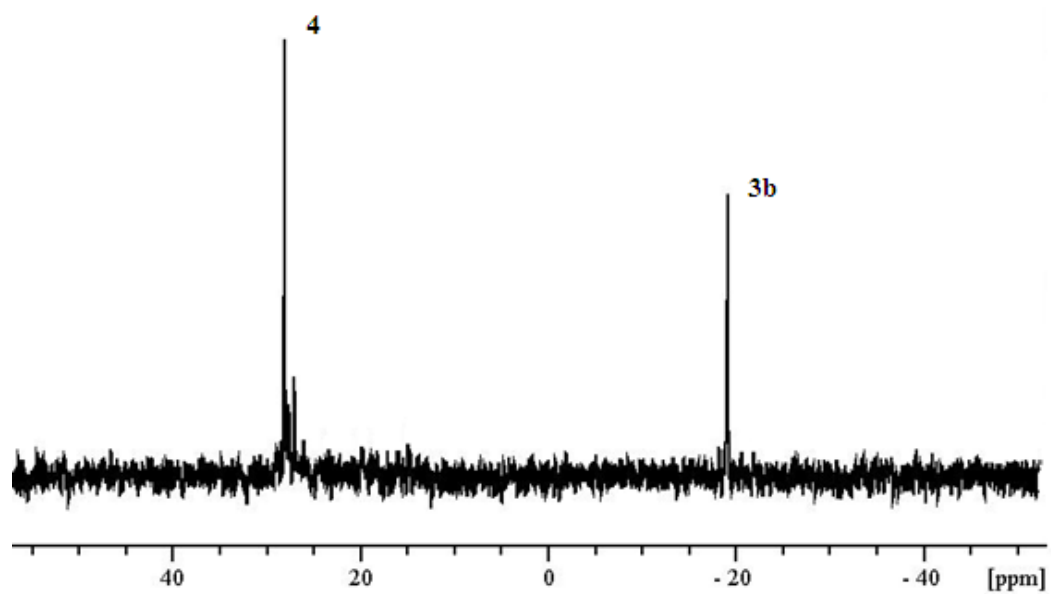

Figure S5.  $^{31}\text{P}$  NMR spectrum of the reaction of **2b** with  $\text{PhICl}_2$  in  $\text{CH}_2\text{Cl}_2$  at 200K

HOMO

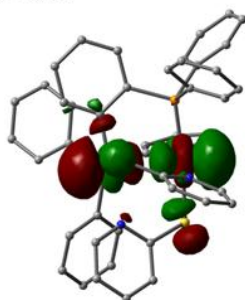

**2a**

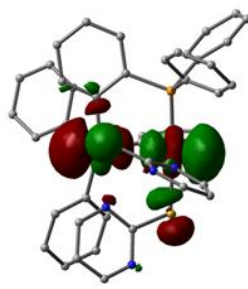

**2d**

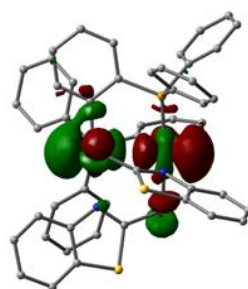

**2g**

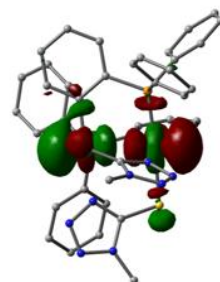

**2h**

LUMO

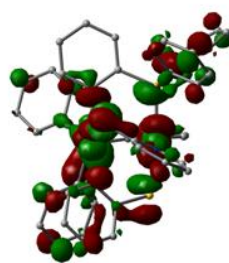

**2a**

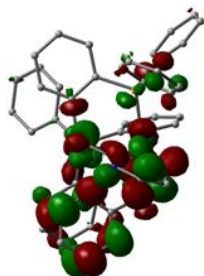

**2d**

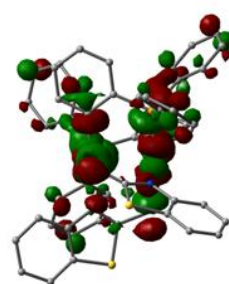

**2g**

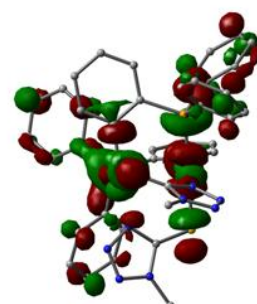

**2h**

Figure S6. Frontier molecular orbitals for Pd(II) complexes with N,S ligands

HOMO

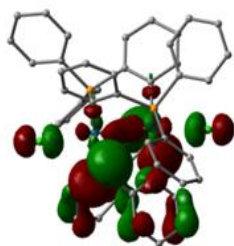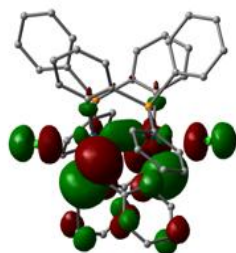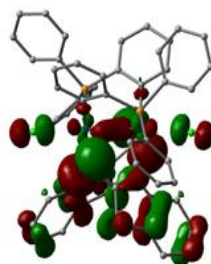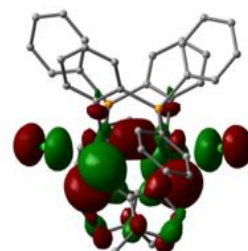

LUMO

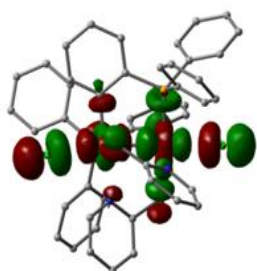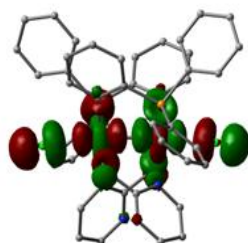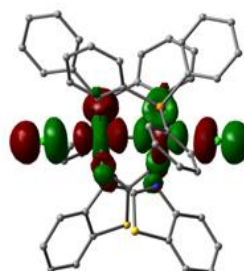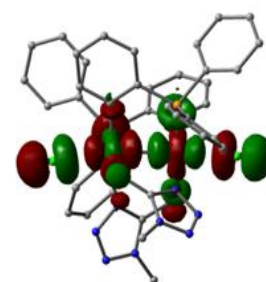

Figure S7. Frontier molecular orbitals for Pd(III) complexes with N,S ligands



**Table S1.** Properties of the electron density at the Pd-S (Pd-O) and Pd-N bond critical points (BCPs) for complexes Pd<sub>2</sub>[(C<sub>6</sub>H<sub>4</sub>)PPh<sub>2</sub>]<sub>2</sub>[N-S]<sub>2</sub> and Pd<sub>2</sub>[(C<sub>6</sub>H<sub>4</sub>)PPh<sub>2</sub>]<sub>2</sub>[N-S]<sub>2</sub>Cl<sub>2</sub>. The selected properties are ρ(BCP) = local electron density at the BCP; Laplacian = second derivative of ρ; ε = ellipticity, which represents the cylindricity of the charge distribution; |V|/G = ratio of potential energy density and kinetic energy density; |λ<sub>1</sub>/λ<sub>3</sub> = ratio between perpendicular and parallel curvatures of the bond paths; E<sub>int</sub> = interaction energy between two interacting atoms; Ω(Pd,X) = delocalization index between Pd and X atoms (X=S, N or O).

| complex                                                                                                       | BCP   | ρ(BCP)<br>e/Å <sup>3</sup> | Laplacian<br>e/Å <sup>5</sup> | ε      | V /G | λ <sub>1</sub> /λ <sub>3</sub> | E <sub>int</sub><br>kJmol <sup>-1</sup> | Ω(Pd,X) |
|---------------------------------------------------------------------------------------------------------------|-------|----------------------------|-------------------------------|--------|------|--------------------------------|-----------------------------------------|---------|
| <b>Pd<sub>2</sub>[(C<sub>6</sub>H<sub>4</sub>)PPh<sub>2</sub>]<sub>2</sub>[N-S]<sub>2</sub></b>               |       |                            |                               |        |      |                                |                                         |         |
| <b>2a</b>                                                                                                     | Pd-S  | 0.5516                     | 4.1844                        | 0.0773 | 1.33 | 0.24                           | -114.2                                  | 0.76    |
|                                                                                                               | Pd-N  | 0.5028                     | 8.3264                        | 0.1264 | 1.08 | 0.15                           | -133.4                                  | 0.51    |
| <b>2b</b>                                                                                                     | Pd-S  | 0.5433                     | 4.1181                        | 0.0761 | 1.33 | 0.23                           | -111.7                                  | 0.74    |
|                                                                                                               | Pd-N  | 0.5026                     | 8.2149                        | 0.1363 | 1.08 | 0.15                           | -132.2                                  | 0.51    |
| <b>2c</b>                                                                                                     | Pd-S  | 0.5481                     | 4.1992                        | 0.0774 | 1.33 | 0.23                           | -113.6                                  | 0.74    |
|                                                                                                               | Pd-N  | 0.5000                     | 8.1348                        | 0.1368 | 1.08 | 0.15                           | -130.9                                  | 0.51    |
| <b>2d</b>                                                                                                     | Pd-S  | 0.5619                     | 4.2140                        | 0.0742 | 1.34 | 0.24                           | -116.7                                  | 0.77    |
|                                                                                                               | Pd-N  | 0.4913                     | 8.2486                        | 0.1242 | 1.08 | 0.15                           | -130.5                                  | 0.50    |
| <b>2e</b>                                                                                                     | Pd-S  | 0.5278                     | 4.1153                        | 0.0838 | 1.32 | 0.23                           | -108.4                                  | 0.73    |
|                                                                                                               | Pd-N  | 0.5458                     | 9.1605                        | 0.1083 | 1.09 | 0.15                           | -150.3                                  | 0.55    |
| <b>2f</b>                                                                                                     | Pd-S  | 0.5232                     | 4.1715                        | 0.0840 | 1.31 | 0.23                           | -108.1                                  | 0.71    |
|                                                                                                               | Pd-N  | 0.5401                     | 9.0605                        | 0.1131 | 1.09 | 0.15                           | -148.1                                  | 0.54    |
| <b>2g</b>                                                                                                     | Pd-S  | 0.5286                     | 4.1807                        | 0.0835 | 1.32 | 0.23                           | -109.4                                  | 0.71    |
|                                                                                                               | Pd-N  | 0.5132                     | 8.5901                        | 0.1212 | 1.08 | 0.15                           | -138.1                                  | 0.51    |
| <b>2h</b>                                                                                                     | Pd-S  | 0.5143                     | 4.1600                        | 0.0876 | 1.30 | 0.23                           | -106.1                                  | 0.70    |
|                                                                                                               | Pd-N  | 0.5397                     | 9.4446                        | 0.1286 | 1.08 | 0.15                           | -152.1                                  | 0.52    |
| <b>Pd<sub>2</sub>[(C<sub>6</sub>H<sub>4</sub>)PPh<sub>2</sub>]<sub>2</sub>[N-S]<sub>2</sub>Cl<sub>2</sub></b> |       |                            |                               |        |      |                                |                                         |         |
| <b>3a</b>                                                                                                     | Pd-S  | 0.5652                     | 3.6773                        | 0.0639 | 1.38 | 0.26                           | -110.7                                  | 0.73    |
|                                                                                                               | Pd-N  | 0.4663                     | 6.9417                        | 0.0789 | 1.08 | 0.16                           | -111.4                                  | 0.47    |
|                                                                                                               | Pd-Cl | 0.4045                     | 3.9378                        | 0.0106 | 1.19 | 0.19                           | -79.5                                   | 0.56    |
| <b>3b</b>                                                                                                     | Pd-S  | 0.5746                     | 3.7259                        | 0.0623 | 1.38 | 0.26                           | -113.3                                  | 0.74    |
|                                                                                                               | Pd-N  | 0.3748                     | 5.3271                        | 0.0820 | 1.05 | 0.15                           | -80.9                                   | 0.41    |
|                                                                                                               | Pd-Cl | 0.3987                     | 3.8720                        | 0.0112 | 1.19 | 0.19                           | -77.9                                   | 0.56    |
| <b>3c</b>                                                                                                     | Pd-S  | 0.5481                     | 4.1992                        | 0.0774 | 1.33 | 0.25                           | -113.6                                  | 0.74    |
|                                                                                                               | Pd-N  | 0.5000                     | 8.1348                        | 0.1368 | 1.08 | 0.15                           | -130.9                                  | 0.41    |

|                                                                                                               |       |        |         |        |      |        |        |      |
|---------------------------------------------------------------------------------------------------------------|-------|--------|---------|--------|------|--------|--------|------|
|                                                                                                               | Pd-Cl | 0.4032 | 3.8940  | 0.0117 | 1.20 | 0.19   | -78.8  | 0.57 |
| <b>3d</b>                                                                                                     | Pd-S  | 0.5686 | 3.6443  | 0.0612 | 1.38 | 0.26   | -110.9 | 0.74 |
|                                                                                                               | Pd-N  | 0.4699 | 7.1286  | 0.0756 | 1.08 | 0.16   | -114.1 | 0.47 |
|                                                                                                               | Pd-Cl | 0.4078 | 3.9819  | 0.0121 | 1.20 | 0.19   | -80.6  | 0.57 |
| <b>3e</b>                                                                                                     | Pd-S  | 0.5310 | 3.5923  | 0.0658 | 1.35 | 0.25   | -102.4 | 0.69 |
|                                                                                                               | Pd-N  | 0.5495 | 8.4893  | 0.0699 | 1.11 | 0.16   | -143.4 | 0.53 |
|                                                                                                               | Pd-Cl | 0.4065 | 3.9299  | 0.0129 | 1.20 | 0.19   | -79.5  | 0.56 |
| <b>3f</b>                                                                                                     | Pd-S  | 0.5387 | 3.7203  | 0.0630 | 1.35 | 0.25   | -105.5 | 0.69 |
|                                                                                                               | Pd-N  | 0.4915 | 7.4909  | 0.0674 | 1.09 | 0.16   | -121.4 | 0.50 |
|                                                                                                               | Pd-Cl | 0.4081 | 3.9393  | 0.0123 | 1.20 | 0.19   | -79.9  | 0.57 |
| <b>3g</b>                                                                                                     | Pd-S  | 0.5483 | 3.7748  | 0.0618 | 1.36 | 0.26   | -108.4 | 0.70 |
|                                                                                                               | Pd-N  | 0.4255 | 6.3538  | 0.0703 | 1.07 | 0.15   | -98.6  | 0.45 |
|                                                                                                               | Pd-Cl | 0.4104 | 3.9558  | 0.0121 | 1.20 | 0.19   | -80.6  | 0.57 |
| <b>3h</b>                                                                                                     | Pd-S  | 0.5181 | 3.6957  | 0.0579 | 1.34 | 0.24   | -101.0 | 0.67 |
|                                                                                                               | Pd-N  | 0.5235 | 8.4632  | 0.0793 | 1.09 | 0.15   | -137.9 | 0.49 |
|                                                                                                               | Pd-Cl | 0.4299 | 4.0506  | 0.0109 | 1.21 | 0.20   | -84.5  | 0.60 |
| <b>Pd<sub>2</sub>[(C<sub>6</sub>H<sub>4</sub>)PPh<sub>2</sub>]<sub>2</sub>[N-O]<sub>2</sub></b>               |       |        |         |        |      |        |        |      |
| <b>NO<sup>a</sup></b>                                                                                         | Pd-O  | 0.5322 | 10.0157 | 0.1186 | 1.04 | 0.16   | -146.4 | 0.51 |
|                                                                                                               | Pd-N  | 0.5448 | 8.7295  | 0.0855 | 1.10 | 0.16   | -146.2 | 0.53 |
| <b>Pd<sub>2</sub>[(C<sub>6</sub>H<sub>4</sub>)PPh<sub>2</sub>]<sub>2</sub>[N-O]<sub>2</sub>Cl<sub>2</sub></b> |       |        |         |        |      |        |        |      |
| <b>NO<sup>a</sup></b>                                                                                         | Pd-O  | 0.5760 | 10.3035 | 0.0514 | 1.06 | 0.1961 | -156.6 | 0.53 |
|                                                                                                               | Pd-N  | 0.5198 | 7.6132  | 0.0584 | 1.11 | 0.1700 | -128.6 | 0.51 |
|                                                                                                               | Pd-Cl | 0.4196 | 4.0687  | 0.0116 | 1.20 | 0.1261 | -83.5  | 0.57 |

<sup>a</sup> N-O = 2-hydroxypyridinate

**Table S2.** Total atomic charges for Pd, S (or O) and N atoms according to the AIM analysis

| $\text{Pd}_2[(\text{C}_6\text{H}_5)\text{PPh}_2][\text{N-S}]_2$ |       |        |        | $\text{Pd}_2[(\text{C}_6\text{H}_5)\text{PPh}_2][\text{N-S}]_2\text{Cl}_2$ |       |        |        |        |
|-----------------------------------------------------------------|-------|--------|--------|----------------------------------------------------------------------------|-------|--------|--------|--------|
| Complex                                                         | q(Pd) | q(N)   | q(S/O) | Complex                                                                    | q(Pd) | q(N)   | q(S/O) | q(Cl)  |
| <b>2a</b>                                                       | 0.331 | -1.257 | -0.162 | <b>3a</b>                                                                  | 0.510 | -1.262 | -0.089 | -0.567 |
| <b>2b</b>                                                       | 0.340 | -1.242 | -0.177 | <b>3b</b>                                                                  | 0.504 | -1.222 | -0.104 | -0.567 |
| <b>2c</b>                                                       | 0.338 | -1.232 | -0.135 | <b>3c</b>                                                                  | 0.501 | -1.216 | -0.095 | -0.561 |
| <b>2d</b>                                                       | 0.324 | -1.247 | -0.088 | <b>3d</b>                                                                  | 0.504 | -1.257 | -0.018 | -0.565 |
| <b>2e</b>                                                       | 0.352 | -1.234 | -0.115 | <b>3e</b>                                                                  | 0.530 | -1.241 | -0.016 | -0.565 |
| <b>2f</b>                                                       | 0.354 | -1.218 | -0.057 | <b>3f</b>                                                                  | 0.525 | -1.201 | 0.006  | -0.558 |
| <b>2g</b>                                                       | 0.341 | -1.244 | 0.007  | <b>3g</b>                                                                  | 0.504 | -1.222 | 0.045  | -0.554 |
| <b>2h</b>                                                       | 0.362 | -0.736 | 0.020  | <b>3h</b>                                                                  | 0.515 | -0.744 | 0.105  | -0.529 |
| $\text{Pd}_2[(\text{C}_6\text{H}_5)\text{PPh}_2][\text{N-O}]_2$ |       |        |        | $\text{Pd}_2[(\text{C}_6\text{H}_5)\text{PPh}_2][\text{N-O}]_2\text{Cl}_2$ |       |        |        |        |
| <b>N-O<sup>a</sup></b>                                          | 0.461 | -1.270 | -1.174 | <b>N-O<sup>a</sup></b>                                                     | 0.642 | -1.280 | -1.138 | -0.562 |

<sup>a</sup>NO = 2-hydroxypyridinate

**Table S3.** Properties of the frontier molecular orbitals for Pd(II) complexes with N,S ligands.  $\epsilon$  [eV] = the orbital energy; %Pd= percentage contribution of palladium atomic orbitals in the molecular orbital as calculated by fragment population analysis; %L<sup>P</sup> = percentage contribution of the phosphine ligands; %L<sup>N,S</sup> = percentage contribution of the N,S ligands; %S = contribution of the sulphur atom only; HOMO = highest occupied molecular orbital; LUMO = lowest unoccupied molecular orbital.

| Compound                    | <b>2a</b>                                                                           |        | <b>2d</b>                                                                           |        | <b>2g</b>                                                                            |        | <b>2h</b>                                                                             |       |
|-----------------------------|-------------------------------------------------------------------------------------|--------|-------------------------------------------------------------------------------------|--------|--------------------------------------------------------------------------------------|--------|---------------------------------------------------------------------------------------|-------|
| N,S-donor ligand            | 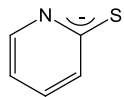 |        |  |        |  |        |  |       |
| Frontier molecular orbitals | HOMO                                                                                | LUMO   | HOMO                                                                                | LUMO   | HOMO                                                                                 | LUMO   | HOMO                                                                                  | LUMO  |
| $\epsilon$ [eV]             | -4.81                                                                               | -1.12  | -4.92                                                                               | -1.25  | -5.10                                                                                | -1.29  | -5.16                                                                                 | -1.28 |
| %Pd                         | 80                                                                                  | 50     | 81                                                                                  | 44     | 77                                                                                   | 57     | 83                                                                                    | 62    |
| %L <sup>P</sup>             | 11                                                                                  | 33     | 10                                                                                  | 22     | 13                                                                                   | 31     | 12                                                                                    | 30    |
| %L <sup>N,S</sup> (%S)      | 10 (7)                                                                              | 17 (8) | 10 (7)                                                                              | 34 (6) | 10 (6)                                                                               | 13 (7) | 5 (4)                                                                                 | 8 (5) |

**Table S4.** Properties of the frontier molecular orbitals for Pd(III) complexes with N,S ligands.  $\epsilon$  [eV] = the orbital energy; %Pd= percentage contribution of palladium atomic orbitals in the molecular orbital as calculated by fragment population analysis; %L<sup>P</sup> = percentage contribution of the phosphine ligands; %L<sup>N,S</sup> = percentage contribution of the N,S ligands; %S = contribution of the sulphur atom only; %Cl = percentage contribution of the axial chlorine atoms. HOMO = highest occupied molecular orbital; LUMO = lowest unoccupied molecular orbital.

| Compound                    | <b>3a</b>                                                                         |       | <b>3d</b>                                                                         |       | <b>3g</b>                                                                          |       | <b>3h</b>                                                                           |       |
|-----------------------------|-----------------------------------------------------------------------------------|-------|-----------------------------------------------------------------------------------|-------|------------------------------------------------------------------------------------|-------|-------------------------------------------------------------------------------------|-------|
| N,S-donor ligand            | 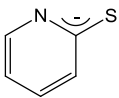 |       |  |       |  |       |  |       |
| Frontier molecular orbitals | HOMO                                                                              | LUMO  | HOMO                                                                              | LUMO  | HOMO                                                                               | LUMO  | HOMO                                                                                | LUMO  |
| $\epsilon$ [eV]             | -5.37                                                                             | -3.26 | -5.66                                                                             | -3.37 | -5.51                                                                              | -3.46 | -5.72                                                                               | -3.43 |
| %Pd                         | 44                                                                                | 65    | 51                                                                                | 65    | 30                                                                                 | 63    | 47                                                                                  | 62    |
| %L <sup>P</sup>             | 4                                                                                 | 13    | 4                                                                                 | 13    | 4                                                                                  | 15    | 4                                                                                   | 14    |
| %L <sup>N,S</sup> (%S)      | 44 (32)                                                                           | 7 (4) | 37 (28)                                                                           | 7 (4) | 58 (32)                                                                            | 7 (3) | 37 (27)                                                                             | 7 (4) |
| %Cl                         | 7                                                                                 | 15    | 8                                                                                 | 15    | 8                                                                                  | 15    | 12                                                                                  | 17    |

**Table S5.** HOMO and LUMO energies and the HOMO-LUMO gaps (eV) for compounds Pd<sub>2</sub>[(C<sub>6</sub>H<sub>5</sub>)PPh<sub>2</sub>][N-S]<sub>2</sub>, Pd<sub>2</sub>[(C<sub>6</sub>H<sub>5</sub>)PPh<sub>2</sub>][N-S]<sub>2</sub>Cl<sub>2</sub>, Pd<sub>2</sub>[(C<sub>6</sub>H<sub>5</sub>)PPh<sub>2</sub>][N-O]<sub>2</sub>, and Pd<sub>2</sub>[(C<sub>6</sub>H<sub>5</sub>)PPh<sub>2</sub>][N-O]<sub>2</sub>Cl<sub>2</sub>.

| Pd <sub>2</sub> [(C <sub>6</sub> H <sub>5</sub> )PPh <sub>2</sub> ][N-S] <sub>2</sub> |       |       |      | Pd <sub>2</sub> [(C <sub>6</sub> H <sub>5</sub> )PPh <sub>2</sub> ][N-S] <sub>2</sub> Cl <sub>2</sub> |       |       |      |
|---------------------------------------------------------------------------------------|-------|-------|------|-------------------------------------------------------------------------------------------------------|-------|-------|------|
| Complex                                                                               | HOMO  | LUMO  | gap  | Complex                                                                                               | HOMO  | LUMO  | gap  |
| <b>2a</b>                                                                             | -4.81 | -1.12 | 3.69 | <b>3a</b>                                                                                             | -5.37 | -3.26 | 2.11 |
| <b>2b</b>                                                                             | -4.73 | -1.13 | 3.60 | <b>3b</b>                                                                                             | -5.24 | -3.30 | 1.94 |
| <b>2c</b>                                                                             | -4.81 | -1.34 | 3.47 | <b>3c</b>                                                                                             | -5.38 | -3.29 | 2.09 |
| <b>2d</b>                                                                             | -4.92 | -1.25 | 3.67 | <b>3d</b>                                                                                             | -5.66 | -3.37 | 2.28 |
| <b>2e</b>                                                                             | -4.68 | -0.93 | 3.75 | <b>3e</b>                                                                                             | -5.06 | -3.17 | 1.89 |
| <b>2f</b>                                                                             | -4.89 | -1.07 | 3.82 | <b>3f</b>                                                                                             | -5.30 | -3.27 | 2.03 |
| <b>2g</b>                                                                             | -5.10 | -1.29 | 3.80 | <b>3g</b>                                                                                             | -5.51 | -3.46 | 2.06 |
| <b>2h</b>                                                                             | -5.16 | -1.28 | 3.87 | <b>3h</b>                                                                                             | -5.72 | -3.43 | 2.29 |
| Pd <sub>2</sub> [(C <sub>6</sub> H <sub>5</sub> )PPh <sub>2</sub> ][N-O] <sub>2</sub> |       |       |      | Pd <sub>2</sub> [(C <sub>6</sub> H <sub>5</sub> )PPh <sub>2</sub> ][N-O] <sub>2</sub> Cl <sub>2</sub> |       |       |      |
| <b>N-O<sup>a</sup></b>                                                                | -4.79 | -1.16 | 3.63 | <b>N-O<sup>a</sup></b>                                                                                | -5.47 | -3.08 | 1.71 |

<sup>a</sup>NO = 2-hydroxypyridinate

**Table S6.** Cartesian coordinates of the optimized structures **2a – h** and **3a – h**.

**2a**

|    |             |             |             |
|----|-------------|-------------|-------------|
| Pd | 0.70266500  | 0.62303600  | 1.18002500  |
| P  | 2.17466200  | -0.82230100 | 0.08743300  |
| S  | -1.00022100 | 1.94481700  | 2.17593000  |
| N  | 1.61845500  | 2.45749900  | 0.43212400  |
| C  | -1.67188700 | 2.87137500  | 0.85779800  |
| Pd | -0.70280600 | 0.62310500  | -1.18003200 |
| P  | -2.17457800 | -0.82266300 | -0.08744700 |
| S  | 0.99968600  | 1.94522100  | -2.17600400 |
| N  | -1.61885600 | 2.45750700  | -0.43216400 |
| C  | -2.32548900 | 4.08434100  | 1.17756900  |
| H  | -2.35327200 | 4.39496600  | 2.21676200  |
| C  | -2.89517400 | 4.85554500  | 0.18566100  |
| H  | -3.39266200 | 5.78917000  | 0.43722100  |
| C  | -2.80402700 | 4.42971700  | -1.14447000 |
| H  | -3.21711300 | 5.00854700  | -1.96411700 |
| C  | -2.15387300 | 3.23693900  | -1.39417500 |
| H  | -2.03483700 | 2.86288100  | -2.40703000 |
| C  | 1.67134800  | 2.87162100  | -0.85776100 |
| C  | 2.32483500  | 4.08469200  | -1.17735000 |
| H  | 2.35253600  | 4.39551300  | -2.21648400 |
| C  | 2.89449900  | 4.85578200  | -0.18534000 |
| H  | 3.39192300  | 5.78947300  | -0.43678300 |
| C  | 2.80345700  | 4.42971600  | 1.14472400  |
| H  | 3.21653500  | 5.00842800  | 1.96445800  |
| C  | 2.15344500  | 3.23682400  | 1.39425000  |
| H  | 2.03452300  | 2.86257700  | 2.40705400  |
| C  | 1.40946000  | -1.53128900 | -1.42105900 |
| C  | 0.25296200  | -0.94853700 | -1.98158000 |
| C  | -0.21029700 | -1.46662900 | -3.20185200 |
| H  | -1.10075400 | -1.03864400 | -3.65664100 |
| C  | 0.43041400  | -2.52666100 | -3.83937000 |
| H  | 0.04254000  | -2.90043700 | -4.78470400 |
| C  | 1.55178200  | -3.11911600 | -3.25888100 |
| H  | 2.04924100  | -3.95684100 | -3.74125700 |
| C  | 2.03477500  | -2.62123300 | -2.05374200 |
| H  | 2.91260200  | -3.07487500 | -1.59921200 |
| C  | 3.71436300  | 0.01846900  | -0.46957100 |
| C  | 4.18928900  | -0.05482300 | -1.78301800 |
| H  | 3.62697600  | -0.60200200 | -2.53250700 |
| C  | 5.37289700  | 0.58981200  | -2.13952500 |
| H  | 5.72679400  | 0.52952000  | -3.16564400 |
| C  | 6.09457500  | 1.31306100  | -1.19238700 |
| H  | 7.01683200  | 1.81475100  | -1.47476600 |
| C  | 5.62270600  | 1.40146200  | 0.11683700  |
| H  | 6.17163300  | 1.97447800  | 0.85986300  |
| C  | 4.43526100  | 0.76658200  | 0.47249300  |
| H  | 4.06039300  | 0.85675400  | 1.48979400  |
| C  | 2.82101600  | -2.31263800 | 0.97034800  |
| C  | 4.14588300  | -2.41484800 | 1.41282700  |
| H  | 4.85043200  | -1.61327400 | 1.21590100  |
| C  | 4.58314400  | -3.55215200 | 2.09172700  |
| H  | 5.61737900  | -3.61288600 | 2.42165400  |
| C  | 3.70680600  | -4.60660300 | 2.33450700  |
| H  | 4.05022200  | -5.49470500 | 2.85917900  |
| C  | 2.38643200  | -4.51670100 | 1.89555900  |
| H  | 1.69124400  | -5.33183400 | 2.07925400  |
| C  | 1.94577600  | -3.37997700 | 1.22425500  |

|   |             |             |             |
|---|-------------|-------------|-------------|
| H | 0.91289900  | -3.32424300 | 0.89494600  |
| C | -1.40932000 | -1.53162500 | 1.42103600  |
| C | -0.25291900 | -0.94871900 | 1.98159200  |
| C | 0.21041100  | -1.46672100 | 3.20187200  |
| H | 1.10080700  | -1.03861800 | 3.65666400  |
| C | -0.43019200 | -2.52683100 | 3.83938700  |
| H | -0.04232600 | -2.90053300 | 4.78475400  |
| C | -1.55146000 | -3.11943600 | 3.25887200  |
| H | -2.04881700 | -3.95723200 | 3.74123200  |
| C | -2.03450100 | -2.62163600 | 2.05371700  |
| H | -2.91223600 | -3.07543700 | 1.59916700  |
| C | -3.71432500 | 0.01798300  | 0.46959500  |
| C | -4.43495600 | 0.76646900  | -0.47238600 |
| H | -4.05986900 | 0.85693200  | -1.48956900 |
| C | -5.62243800 | 1.40132200  | -0.11677200 |
| H | -6.17113500 | 1.97467300  | -0.85970700 |
| C | -6.09458900 | 1.31250800  | 1.19231900  |
| H | -7.01688400 | 1.81413400  | 1.47469200  |
| C | -5.37314600 | 0.58892500  | 2.13938700  |
| H | -5.72732500 | 0.52827800  | 3.16538800  |
| C | -4.18949500 | -0.05564900 | 1.78293000  |
| H | -3.62730600 | -0.60304900 | 2.53235500  |
| C | -2.82064300 | -2.31310800 | -0.97040400 |
| C | -4.14547000 | -2.41561000 | -1.41295800 |
| H | -4.85024300 | -1.61423700 | -1.21605600 |
| C | -4.58243400 | -3.55300600 | -2.09190700 |
| H | -5.61664400 | -3.61396400 | -2.42187600 |
| C | -3.70584900 | -4.60725800 | -2.33466400 |
| H | -4.04900100 | -5.49542300 | -2.85939700 |
| C | -2.38553800 | -4.51708400 | -1.89559800 |
| H | -1.69016100 | -5.33206700 | -2.07926600 |
| C | -1.94517900 | -3.38026900 | -1.22424900 |
| H | -0.91235700 | -3.32433600 | -0.89480200 |

## 2b

|    |             |             |             |
|----|-------------|-------------|-------------|
| Pd | 0.78831100  | -0.55027300 | -1.13814900 |
| P  | 2.20940100  | 0.90333500  | 0.00730700  |
| S  | -0.94405500 | -1.85621000 | -2.11937900 |
| N  | 1.75464600  | -2.38212100 | -0.44066700 |
| C  | -1.67184200 | -2.80785300 | -0.84489900 |
| Pd | -0.78829000 | -0.55013900 | 1.13816700  |
| S  | 0.94417100  | -1.85598400 | 2.11941500  |
| P  | -2.20938900 | 0.90331800  | -0.00733700 |
| N  | -1.75463500 | -2.38190300 | 0.44077800  |
| C  | -2.25806100 | -4.03264600 | -1.22965400 |
| H  | -2.16740800 | -4.34736100 | -2.26359600 |
| C  | -2.92555400 | -4.79936400 | -0.29817300 |
| H  | -3.38011100 | -5.74410000 | -0.58696600 |
| C  | -3.00296000 | -4.34801000 | 1.01993700  |
| H  | -3.51857600 | -4.92273300 | 1.78286000  |
| C  | -2.40337000 | -3.14213300 | 1.35940900  |
| C  | -2.45831100 | -2.64927500 | 2.77647900  |
| H  | -2.69527100 | -1.57973900 | 2.81896000  |
| H  | -1.48271800 | -2.77430600 | 3.26000700  |
| H  | -3.20961000 | -3.20268800 | 3.34901000  |
| C  | 1.67182500  | -2.80789700 | 0.84506600  |
| C  | 2.25790500  | -4.03270800 | 1.22995300  |
| H  | 2.16719400  | -4.34733700 | 2.26391500  |

|   |             |             |             |
|---|-------------|-------------|-------------|
| C | 2.92532800  | -4.79959400 | 0.29854100  |
| H | 3.37979700  | -5.74433500 | 0.58745200  |
| C | 3.00278700  | -4.34839400 | -1.01960700 |
| H | 3.51835500  | -4.92323300 | -1.78247500 |
| C | 1.34940500  | 1.60592000  | 1.46610400  |
| C | 0.16095600  | 1.02424100  | 1.95558400  |
| C | -0.36363900 | 1.53938200  | 3.15327000  |
| H | -1.28006600 | 1.11479900  | 3.55782200  |
| C | 0.24491100  | 2.59221100  | 3.83290500  |
| H | -0.19278200 | 2.96024300  | 4.75854700  |
| C | 1.39690500  | 3.18536100  | 3.31712500  |
| H | 1.87018500  | 4.01891100  | 3.83010400  |
| C | 1.94148700  | 2.69162900  | 2.13722100  |
| H | 2.84480600  | 3.14389200  | 1.73400800  |
| C | 2.40329000  | -3.14249200 | -1.35920400 |
| C | 2.45823800  | -2.64977900 | -2.77632800 |
| H | 2.69483300  | -1.58017500 | -2.81887300 |
| H | 1.48273400  | -2.77518200 | -3.25995300 |
| H | 3.20978400  | -3.20300300 | -3.34871100 |
| C | 2.88575500  | 2.40311700  | -0.83873400 |
| C | 4.23043200  | 2.52390700  | -1.21149700 |
| H | 4.93533600  | 1.73291000  | -0.97727400 |
| C | 4.68792700  | 3.66816000  | -1.86500000 |
| H | 5.73727000  | 3.74288500  | -2.13983500 |
| C | 3.81209700  | 4.71188200  | -2.15177000 |
| H | 4.17092900  | 5.60542600  | -2.65651600 |
| C | 2.47212500  | 4.60416400  | -1.78174600 |
| H | 1.77696700  | 5.41099600  | -1.99917800 |
| C | 2.01183000  | 3.46056000  | -1.13571200 |
| H | 0.96440400  | 3.39187700  | -0.85918900 |
| C | 3.72461000  | 0.08726500  | 0.66524700  |
| C | 4.54132800  | -0.62287600 | -0.22599000 |
| H | 4.26096000  | -0.69438200 | -1.27394000 |
| C | 5.70737400  | -1.24323900 | 0.21612800  |
| H | 6.33029400  | -1.78649300 | -0.48999800 |
| C | 6.06357200  | -1.17734600 | 1.56239600  |
| H | 6.96892300  | -1.66734500 | 1.91197100  |
| C | 5.24765500  | -0.49069900 | 2.45886400  |
| H | 5.51051500  | -0.44736500 | 3.51282800  |
| C | 4.08499800  | 0.13787600  | 2.01601100  |
| H | 3.44887200  | 0.65408900  | 2.72708900  |
| C | -1.34933700 | 1.60584600  | -1.46613200 |
| C | -0.16090800 | 1.02410100  | -1.95559000 |
| C | 0.36373000  | 1.53916900  | -3.15328800 |
| H | 1.28015200  | 1.11452700  | -3.55779100 |
| C | -0.24475000 | 2.59200600  | -3.83297000 |
| H | 0.19297200  | 2.95997700  | -4.75862000 |
| C | -1.39671600 | 3.18523300  | -3.31721500 |
| H | -1.86995000 | 4.01879300  | -3.83021900 |
| C | -1.94133700 | 2.69157200  | -2.13730100 |
| H | -2.84463600 | 3.14389800  | -1.73411900 |
| C | -2.88584100 | 2.40309800  | 0.83861700  |
| C | -2.01192900 | 3.46051000  | 1.13576300  |
| H | -0.96446700 | 3.39181600  | 0.85938900  |
| C | -2.47228000 | 4.60408500  | 1.78180500  |
| H | -1.77712700 | 5.41088300  | 1.99938000  |
| C | -3.81230100 | 4.71181300  | 2.15166600  |
| H | -4.17117900 | 5.60532700  | 2.65643200  |
| C | -4.68810800 | 3.66812000  | 1.86473500  |
| H | -5.73748600 | 3.74285200  | 2.13942600  |

|   |             |             |             |
|---|-------------|-------------|-------------|
| C | -4.23055500 | 2.52388400  | 1.21124400  |
| H | -4.93543400 | 1.73289900  | 0.97691300  |
| C | -3.72456500 | 0.08718600  | -0.66533600 |
| C | -4.08475200 | 0.13757900  | -2.01616100 |
| H | -3.44846900 | 0.65358200  | -2.72725100 |
| C | -5.24738900 | -0.49100000 | -2.45907500 |
| H | -5.51010200 | -0.44781600 | -3.51308100 |
| C | -6.06346800 | -1.17744900 | -1.56261000 |
| H | -6.96880700 | -1.66745400 | -1.91221100 |
| C | -5.70745400 | -1.24314300 | -0.21628000 |
| H | -6.33049900 | -1.78627200 | 0.48983000  |
| C | -4.54144400 | -0.62276600 | 0.22590500  |
| H | -4.26124100 | -0.69409000 | 1.27391000  |

## 2c

|    |             |             |             |
|----|-------------|-------------|-------------|
| Pd | -0.95020200 | -0.24659700 | 0.99653400  |
| Pd | 0.95011600  | -0.24659600 | -0.99663100 |
| P  | -2.17928700 | 1.21617100  | -0.34361400 |
| P  | 2.17935200  | 1.21605200  | 0.34353900  |
| S  | 0.55642400  | -1.59414500 | 2.24584200  |
| S  | -0.55663500 | -1.59406300 | -2.24588200 |
| N  | 1.81371400  | -2.05972200 | -0.12863000 |
| N  | -1.81388800 | -2.05965700 | 0.12858600  |
| C  | -4.51040600 | -0.31556000 | -0.44726400 |
| H  | -4.36802600 | -0.41154400 | 0.62652100  |
| C  | 1.10810000  | 1.91137800  | 1.65808000  |
| C  | 0.13733800  | 1.32121300  | -1.95997500 |
| C  | -0.13729700 | 1.32117300  | 1.95987400  |
| C  | -2.96473900 | 2.71510300  | 0.40042000  |
| C  | 2.64168000  | -2.81797700 | -0.93034500 |
| C  | 4.51037300  | -0.31582000 | 0.44715200  |
| H  | 4.36805700  | -0.41167900 | -0.62665200 |
| C  | 3.58312700  | 0.40448300  | 1.21391800  |
| C  | -1.10802400 | 1.91148500  | -1.65815100 |
| C  | 1.54149000  | -2.47302400 | 1.11500900  |
| C  | 3.22784100  | -4.03245100 | -0.47486100 |
| C  | -2.64183600 | -2.81790900 | 0.93032300  |
| C  | 2.96495700  | 2.71497900  | -0.40035000 |
| C  | 1.58364900  | 2.99866600  | 2.41502400  |
| H  | 2.53323200  | 3.46002400  | 2.15350700  |
| C  | 2.11293000  | -3.68541200 | 1.62723200  |
| H  | 1.85967200  | -3.97642700 | 2.64091300  |
| C  | -3.58316200 | 0.40476200  | -1.21401800 |
| C  | -2.11299700 | -3.68543400 | -1.62720500 |
| H  | -1.85972000 | -3.97648700 | -2.64087300 |
| C  | -2.94871700 | -2.38052800 | 2.23987500  |
| H  | -2.50013000 | -1.45534400 | 2.59386100  |
| C  | 2.93095800  | -4.44612000 | 0.85136300  |
| H  | 3.35869800  | -5.37141700 | 1.23195000  |
| C  | 3.75891900  | 0.47338900  | 2.59996900  |
| H  | 3.03264500  | 0.99665700  | 3.21300800  |
| C  | 5.60893200  | -0.92461800 | 1.04918100  |
| H  | 6.31854800  | -1.47752800 | 0.43908300  |
| C  | -2.14132100 | 3.77608200  | 0.80756500  |
| H  | -1.06645800 | 3.71082200  | 0.66984700  |
| C  | -0.84214800 | 1.82896600  | 3.06453200  |
| H  | -1.80804600 | 1.39935100  | 3.32195300  |
| C  | 2.94846900  | -2.38067600 | -2.23994000 |
| H  | 2.49977400  | -1.45557200 | -2.59399300 |



|   |             |             |             |
|---|-------------|-------------|-------------|
| C | -1.54163300 | -2.47299000 | -1.11503900 |
| C | -1.58347300 | 2.99885700  | -2.41502300 |
| H | -2.53300700 | 3.46029500  | -2.15347500 |
| C | 2.14161900  | 3.77595700  | -0.80766700 |
| H | 1.06672300  | 3.71066300  | -0.67022600 |
| C | 0.84222500  | 1.82899300  | -3.06460800 |
| H | 1.80810400  | 1.39933800  | -3.32204300 |
| C | 4.07741900  | -4.76754000 | -1.33003900 |
| H | 4.51019000  | -5.69500300 | -0.96056600 |
| C | 4.85454500  | -0.14433800 | 3.20151600  |
| H | 4.97544800  | -0.08626300 | 4.28033200  |
| C | -3.75903900 | 0.47379200  | -2.60005100 |
| H | -3.03276500 | 0.99705000  | -3.21309900 |
| C | -4.34695600 | 2.82814500  | 0.59580200  |
| H | -5.01077200 | 2.03219600  | 0.27401600  |
| C | -3.22790200 | -4.03244900 | 0.47489700  |
| C | 4.89098000  | 3.96986600  | -1.18352800 |
| H | 5.96731800  | 4.03920300  | -1.32079100 |
| C | -0.35104500 | 2.88221000  | 3.83212400  |
| H | -0.92703200 | 3.24457700  | 4.68104600  |
| C | 4.34722100  | 2.82807800  | -0.59536900 |
| H | 5.01097800  | 2.03212600  | -0.27347600 |
| C | -4.85474000 | -0.14381400 | -3.20158600 |
| H | -4.97569900 | -0.08565100 | -4.28039000 |
| C | -2.68701800 | 4.91755100  | 1.38735800  |
| H | -2.03011100 | 5.72795300  | 1.69266700  |
| C | -4.06419400 | 5.01803900  | 1.58096800  |
| H | -4.48971300 | 5.90966500  | 2.03468800  |
| C | 3.78726700  | -3.11418400 | -3.05370400 |
| H | 4.00310100  | -2.75700200 | -4.05754500 |
| C | -2.93097500 | -4.44615900 | -0.85130000 |
| H | -3.35865000 | -5.37149900 | -1.23185100 |
| C | -4.89059100 | 3.96988300  | 1.18416700  |
| H | -5.96689500 | 4.03919300  | 1.32170600  |
| C | 4.06465900  | 5.01801500  | -1.58049500 |
| H | 4.49027200  | 5.90970100  | -2.03400900 |
| C | 0.86228400  | 3.48408200  | 3.49965800  |
| H | 1.24618700  | 4.31879900  | 4.08080300  |
| C | 5.78452800  | -0.83733600 | 2.42969200  |
| H | 6.63751500  | -1.31775300 | 2.90260900  |
| C | 0.35119300  | 2.88230800  | -3.83215800 |
| H | 0.92720500  | 3.24466100  | -4.68106700 |
| C | -0.86207900 | 3.48426400  | -3.49964900 |
| H | -1.24593400 | 4.31904300  | -4.08074200 |
| C | -4.07744400 | -4.76754900 | 1.33010200  |
| H | -4.51013400 | -5.69506600 | 0.96067400  |
| C | -5.60904600 | -0.92422800 | -1.04927600 |
| H | -6.31865900 | -1.47713900 | -0.43917700 |
| C | -3.78748000 | -3.11404700 | 3.05365900  |
| H | -4.00338100 | -2.75680600 | 4.05746500  |
| C | 4.35794800  | -4.32035800 | -2.60302900 |
| H | 5.01314400  | -4.89132600 | -3.25531400 |
| C | -5.78472700 | -0.83681800 | -2.42976600 |
| H | -6.63777600 | -1.31713700 | -2.90267300 |
| C | -4.35804200 | -4.32030700 | 2.60305500  |
| H | -5.01320100 | -4.89129200 | 3.25536400  |
| C | 2.68743000  | 4.91747500  | -1.38725000 |
| H | 2.03057700  | 5.72786500  | -1.69270600 |

## 2d

|    |             |             |             |
|----|-------------|-------------|-------------|
| Pd | 0.68732300  | 0.62729300  | 1.18359400  |
| P  | 2.17043000  | -0.82234000 | 0.10103900  |
| S  | -0.98451300 | 1.96382600  | 2.19809000  |
| N  | 1.60068900  | 2.45946400  | 0.40871100  |
| C  | -1.69476600 | 2.86198900  | 0.89098500  |
| Pd | -0.68723400 | 0.62750300  | -1.18358100 |
| P  | -2.17048100 | -0.82220800 | -0.10104500 |
| S  | 0.98469300  | 1.96386400  | -2.19808000 |
| N  | -1.60044500 | 2.45978000  | -0.40867900 |
| C  | -2.90704800 | 4.72406700  | 0.32193600  |
| H  | -3.44943200 | 5.60489500  | 0.66591600  |
| C  | -2.79216700 | 4.43567800  | -1.03911300 |
| H  | -3.20576400 | 5.07514100  | -1.81062800 |
| C  | -2.12058300 | 3.26735400  | -1.34726200 |
| H  | -1.98057800 | 2.94080100  | -2.37405800 |
| C  | 1.69505000  | 2.86181600  | -0.89090500 |
| C  | 2.90778600  | 4.72354200  | -0.32168300 |
| H  | 3.45039000  | 5.60426900  | -0.66557700 |
| C  | 2.79273200  | 4.43510800  | 1.03935200  |
| H  | 3.20639000  | 5.07445000  | 1.81093600  |
| C  | 2.12095600  | 3.26687300  | 1.34738500  |
| H  | 1.98090100  | 2.94024100  | 2.37415300  |
| C  | 1.42338800  | -1.52081100 | -1.42079200 |
| C  | 0.27305700  | -0.93593600 | -1.99112700 |
| C  | -0.17922900 | -1.44755600 | -3.21785200 |
| H  | -1.06408500 | -1.01613900 | -3.68010900 |
| C  | 0.46711700  | -2.50572600 | -3.85262300 |
| H  | 0.08844900  | -2.87570000 | -4.80309300 |
| C  | 1.58354600  | -3.09995800 | -3.26426100 |
| H  | 2.08597600  | -3.93503800 | -3.74593100 |
| C  | 2.05562300  | -2.60722700 | -2.05283300 |
| H  | 2.92987500  | -3.06189400 | -1.59256600 |
| C  | 3.71077900  | 0.02996000  | -0.43314300 |
| C  | 4.18075000  | -0.00225600 | -1.74991900 |
| H  | 3.61693000  | -0.52766200 | -2.51372200 |
| C  | 5.36149400  | 0.65634700  | -2.09082200 |
| H  | 5.71005100  | 0.63089600  | -3.12000500 |
| C  | 6.08549700  | 1.35084100  | -1.12463200 |
| H  | 7.00512700  | 1.86344200  | -1.39526700 |
| C  | 5.61886300  | 1.39800700  | 0.18890400  |
| H  | 6.17144300  | 1.94687700  | 0.94737500  |
| C  | 4.43337000  | 0.75130000  | 0.52910200  |
| H  | 4.06311700  | 0.80713200  | 1.55096600  |
| C  | 2.80761400  | -2.31755800 | 0.98074300  |
| C  | 4.13583200  | -2.43736900 | 1.40833400  |
| H  | 4.84872700  | -1.64500700 | 1.20452600  |
| C  | 4.56533800  | -3.58125600 | 2.08117200  |
| H  | 5.60212300  | -3.65601200 | 2.39988900  |
| C  | 3.67785900  | -4.62433600 | 2.33213400  |
| H  | 4.01515800  | -5.51733900 | 2.85235900  |
| C  | 2.35423900  | -4.51711400 | 1.90692900  |
| H  | 1.65074900  | -5.32365600 | 2.09664400  |
| C  | 1.92124700  | -3.37402400 | 1.24156200  |
| H  | 0.88605400  | -3.30506100 | 0.92224400  |
| C  | -1.42361700 | -1.52071300 | 1.42088300  |
| C  | -0.27319200 | -0.93599900 | 1.99120500  |
| C  | 0.17893800  | -1.44754000 | 3.21801600  |
| H  | 1.06383300  | -1.01622200 | 3.68028200  |

|   |             |             |             |
|---|-------------|-------------|-------------|
| C | -0.46764200 | -2.50551400 | 3.85288600  |
| H | -0.08909600 | -2.87545500 | 4.80341800  |
| C | -1.58415500 | -3.09959600 | 3.26454300  |
| H | -2.08676200 | -3.93452700 | 3.74629000  |
| C | -2.05608700 | -2.60692600 | 2.05303000  |
| H | -2.93042000 | -3.06147300 | 1.59279800  |
| C | -3.71085400 | 0.03020300  | 0.43290100  |
| C | -4.43334600 | 0.75147200  | -0.52947500 |
| H | -4.06301900 | 0.80719800  | -1.55131200 |
| C | -5.61882700 | 1.39827700  | -0.18942200 |
| H | -6.17131300 | 1.94712000  | -0.94798000 |
| C | -6.08554100 | 1.35129300  | 1.12409300  |
| H | -7.00516000 | 1.86397200  | 1.39462500  |
| C | -5.36164400 | 0.65686300  | 2.09040700  |
| H | -5.71028200 | 0.63154400  | 3.11956500  |
| C | -4.18092100 | -0.00185100 | 1.74964800  |
| H | -3.61719400 | -0.52725900 | 2.51352200  |
| C | -2.80775500 | -2.31739100 | -0.98071900 |
| C | -4.13606600 | -2.43731900 | -1.40797400 |
| H | -4.84897600 | -1.64503900 | -1.20393200 |
| C | -4.56563100 | -3.58121500 | -2.08076100 |
| H | -5.60250100 | -3.65607300 | -2.39918400 |
| C | -3.67809400 | -4.62416500 | -2.33205500 |
| H | -4.01541900 | -5.51714300 | -2.85229700 |
| C | -2.35436400 | -4.51681700 | -1.90722600 |
| H | -1.65082500 | -5.32325800 | -2.09721100 |
| C | -1.92132700 | -3.37372600 | -1.24188100 |
| H | -0.88605400 | -3.30467700 | -0.92284500 |
| N | 2.36625200  | 3.97054100  | -1.26531900 |
| N | -2.36563100 | 3.97088100  | 1.26550600  |

## 2e

|    |             |             |             |
|----|-------------|-------------|-------------|
| Pd | -0.64475200 | -0.58022800 | 1.24398500  |
| P  | -2.14181800 | 0.85959000  | 0.19013500  |
| S  | 1.07901500  | -1.92833900 | 2.21323600  |
| N  | 1.56546400  | -2.35782800 | -0.48391700 |
| C  | 1.61971900  | -2.76539600 | 0.79095400  |
| Pd | 0.64470900  | -0.58015300 | -1.24400300 |
| P  | 2.14173900  | 0.85970000  | -0.19022700 |
| S  | -1.07908600 | -1.92830700 | -2.21317800 |
| C  | 2.12013900  | -3.35223600 | -1.25500200 |
| H  | 2.15791000  | -3.26779500 | -2.33124700 |
| C  | 2.48299900  | -4.75647300 | 2.03904600  |
| H  | 1.65584000  | -4.62105700 | 2.74026300  |
| H  | 3.40875900  | -4.42183700 | 2.51997400  |
| H  | 2.57253200  | -5.81392700 | 1.77840900  |
| C  | -1.61950800 | -2.76559200 | -0.79091800 |
| C  | 2.54124200  | -4.36786100 | -0.45052700 |
| H  | 3.02818400  | -5.30750000 | -0.66532300 |
| N  | 2.21426900  | -3.99642900 | 0.83892200  |
| C  | -2.48229400 | -4.75691400 | -2.03897900 |
| H  | -2.57056300 | -5.81452300 | -1.77852100 |
| H  | -1.65565100 | -4.62047200 | -2.74059800 |
| H  | -3.40866900 | -4.42315600 | -2.51933000 |
| N  | -1.56544800 | -2.35796100 | 0.48394400  |
| C  | -2.11986600 | -3.35251000 | 1.25503200  |
| H  | -2.15770700 | -3.26805200 | 2.33127200  |
| C  | -2.54061800 | -4.36829100 | 0.45057200  |
| H  | -3.02718800 | -5.30812000 | 0.66538500  |

|   |             |             |             |
|---|-------------|-------------|-------------|
| N | -2.21365400 | -3.99682300 | -0.83886800 |
| C | -1.46296900 | 1.58156300  | -1.35411700 |
| C | -0.34710900 | 0.99571800  | -1.98921700 |
| C | 0.04067000  | 1.51934900  | -3.23366400 |
| H | 0.89827300  | 1.08881700  | -3.74586600 |
| C | -0.63291100 | 2.58595200  | -3.82385800 |
| H | -0.30403600 | 2.96357400  | -4.78991300 |
| C | -1.71192100 | 3.18132100  | -3.17000600 |
| H | -2.23356400 | 4.02517100  | -3.61486200 |
| C | -2.12155300 | 2.67870900  | -1.93994400 |
| H | -2.96629500 | 3.13486600  | -1.42893200 |
| C | -3.70497400 | 0.01575600  | -0.29461700 |
| C | -4.36352000 | -0.75862600 | 0.67111100  |
| H | -3.92090200 | -0.87759900 | 1.65728600  |
| C | -5.57090000 | -1.38640800 | 0.37515400  |
| H | -6.07139200 | -1.97910600 | 1.13681800  |
| C | -6.12509200 | -1.26563600 | -0.89901900 |
| H | -7.06458300 | -1.75989300 | -1.13443700 |
| C | -5.46458600 | -0.51785100 | -1.87134700 |
| H | -5.88318800 | -0.43103500 | -2.87098700 |
| C | -4.26109100 | 0.12045000  | -1.57346700 |
| H | -3.74859500 | 0.68939300  | -2.34216700 |
| C | -2.75341000 | 2.33858700  | 1.11620700  |
| C | -1.87898800 | 3.41668600  | 1.32205000  |
| H | -0.86832400 | 3.37728200  | 0.92776400  |
| C | -2.29199800 | 4.54251700  | 2.02831900  |
| H | -1.59806800 | 5.36640000  | 2.17388200  |
| C | -3.58268400 | 4.60998200  | 2.55149900  |
| H | -3.90430500 | 5.48930700  | 3.10410100  |
| C | -4.45777000 | 3.54442100  | 2.35703900  |
| H | -5.46942600 | 3.58769500  | 2.75317600  |
| C | -4.04874300 | 2.41838400  | 1.64268300  |
| H | -4.75224500 | 1.60706700  | 1.48525900  |
| C | 1.46289600  | 1.58155800  | 1.35408600  |
| C | 0.34703400  | 0.99568800  | 1.98915600  |
| C | -0.04077900 | 1.51931000  | 3.23359600  |
| H | -0.89840200 | 1.08877800  | 3.74576700  |
| C | 0.63278400  | 2.58590700  | 3.82382100  |
| H | 0.30387600  | 2.96351800  | 4.78986900  |
| C | 1.71180900  | 3.18128400  | 3.17000600  |
| H | 2.23345300  | 4.02511900  | 3.61489000  |
| C | 2.12145700  | 2.67870100  | 1.93993700  |
| H | 2.96620000  | 3.13487700  | 1.42894600  |
| C | 2.75324000  | 2.33883700  | -1.11614000 |
| C | 1.87867300  | 3.41683100  | -1.32196700 |
| H | 0.86796300  | 3.37721600  | -0.92782700 |
| C | 2.29160800  | 4.54282100  | -2.02802000 |
| H | 1.59756900  | 5.36661300  | -2.17358100 |
| C | 3.58236900  | 4.61056600  | -2.55099400 |
| H | 3.90393000  | 5.49002200  | -3.10342200 |
| C | 4.45759500  | 3.54512600  | -2.35653800 |
| H | 5.46930800  | 3.58861400  | -2.75250800 |
| C | 4.04863900  | 2.41892300  | -1.64239500 |
| H | 4.75225400  | 1.60770300  | -1.48497800 |
| C | 3.70494200  | 0.01587200  | 0.29440900  |
| C | 4.36358100  | -0.75827900 | -0.67144100 |
| H | 3.92102000  | -0.87708800 | -1.65766800 |
| C | 5.57098700  | -1.38604200 | -0.37555600 |
| H | 6.07155800  | -1.97854800 | -1.13731800 |
| C | 6.12511500  | -1.26549300 | 0.89866900  |

|   |            |             |            |
|---|------------|-------------|------------|
| H | 7.06463200 | -1.75973100 | 1.13402400 |
| C | 5.46451000 | -0.51795800 | 1.87111700 |
| H | 5.88305100 | -0.43132300 | 2.87079900 |
| C | 4.26098400 | 0.12032700  | 1.57331000 |
| H | 3.74841700 | 0.68908300  | 2.34209900 |

## 2f

|    |             |             |             |
|----|-------------|-------------|-------------|
| Pd | -0.81780600 | -0.11554200 | 1.13448600  |
| S  | 0.76726100  | -1.46927300 | 2.31588300  |
| P  | -2.16156400 | 1.32387100  | -0.10789900 |
| N  | 2.16379800  | -3.50910200 | 1.18382100  |
| C  | 1.53131200  | -2.29705300 | 1.00742500  |
| Pd | 0.81760900  | -0.11477200 | -1.13462800 |
| P  | 2.16047300  | 1.32530900  | 0.10764600  |
| S  | -0.76664000 | -1.46963900 | -2.31598000 |
| N  | 1.65037000  | -1.88794300 | -0.26119900 |
| C  | 2.25131700  | -4.26431500 | 2.41171000  |
| H  | 1.47163000  | -3.91625200 | 3.09177900  |
| H  | 3.22870700  | -4.13066200 | 2.88942900  |
| H  | 2.09459000  | -5.32604200 | 2.19802000  |
| N  | -1.64911100 | -1.88954800 | 0.26115100  |
| C  | 2.71687800  | -3.87998000 | -0.02712800 |
| N  | -2.16055700 | -3.51124500 | -1.18396200 |
| C  | 3.46780200  | -4.98834200 | -0.40953700 |
| H  | 3.74005000  | -5.76680100 | 0.29770600  |
| C  | 3.86301900  | -5.05527500 | -1.74457000 |
| H  | 4.44950900  | -5.90538800 | -2.08293500 |
| C  | 3.51792300  | -4.04657700 | -2.65771000 |
| H  | 3.83992700  | -4.13402300 | -3.69221500 |
| C  | 2.76827900  | -2.93926300 | -2.26805400 |
| H  | 2.48464200  | -2.16327700 | -2.97311400 |
| C  | 2.36901900  | -2.85932100 | -0.93304500 |
| C  | -1.52957400 | -2.29844800 | -1.00749500 |
| C  | -2.24734000 | -4.26616300 | -2.41209200 |
| H  | -1.46604200 | -3.91926300 | -3.09092300 |
| H  | -3.22374500 | -4.13101100 | -2.89140500 |
| H  | -2.09257200 | -5.32811400 | -2.19815300 |
| C  | -1.26131400 | 2.04808000  | -1.53251100 |
| C  | -0.06524600 | 1.46499800  | -2.00140700 |
| C  | 0.49477700  | 1.99222300  | -3.17722500 |
| H  | 1.41847800  | 1.56626700  | -3.56308200 |
| C  | -0.08998000 | 3.05856600  | -3.85646300 |
| H  | 0.37306600  | 3.43746700  | -4.76523200 |
| C  | -1.25138000 | 3.65204800  | -3.36177800 |
| H  | -1.70519900 | 4.49634500  | -3.87476300 |
| C  | -1.83036200 | 3.14655600  | -2.20338800 |
| H  | -2.73943300 | 3.60136000  | -1.81661600 |
| C  | -2.90461900 | 2.79884800  | 0.72133500  |
| C  | -4.26456300 | 2.87215700  | 1.04779600  |
| H  | -4.93258400 | 2.05748900  | 0.78755300  |
| C  | -4.78124100 | 3.99684700  | 1.69073900  |
| H  | -5.84105200 | 4.03577700  | 1.93030400  |
| C  | -3.94979800 | 5.06646900  | 2.01271300  |
| H  | -4.35480900 | 5.94499800  | 2.50878900  |
| C  | -2.59450100 | 5.00412100  | 1.69093200  |
| H  | -1.93403000 | 5.83123000  | 1.93818800  |
| C  | -2.07478200 | 3.87997200  | 1.05595300  |
| H  | -1.01590200 | 3.84499700  | 0.81867600  |
| C  | -3.63002700 | 0.47432900  | -0.82260000 |

|   |             |             |             |
|---|-------------|-------------|-------------|
| C | -3.98823000 | 0.58635200  | -2.17010600 |
| H | -3.37086900 | 1.16542600  | -2.84888900 |
| C | -5.12590500 | -0.06035900 | -2.65136100 |
| H | -5.38953200 | 0.03174600  | -3.70208600 |
| C | -5.91573300 | -0.82535700 | -1.79577000 |
| H | -6.80181000 | -1.32903100 | -2.17449100 |
| C | -5.55904900 | -0.95271200 | -0.45352600 |
| H | -6.15738200 | -1.56220600 | 0.21856300  |
| C | -4.41880600 | -0.31374000 | 0.02745900  |
| H | -4.13055700 | -0.44208900 | 1.06798600  |
| C | 1.25982600  | 2.04860000  | 1.53252500  |
| C | 0.06397100  | 1.46483400  | 2.00114500  |
| C | -0.49653300 | 1.99164700  | 3.17692500  |
| H | -1.42013300 | 1.56524800  | 3.56253200  |
| C | 0.08764400  | 3.05812200  | 3.85646200  |
| H | -0.37575700 | 3.43668800  | 4.76518700  |
| C | 1.24891000  | 3.65215000  | 3.36213600  |
| H | 1.70230900  | 4.49651900  | 3.87538100  |
| C | 1.82827900  | 3.14716800  | 2.20371600  |
| H | 2.73718100  | 3.60249400  | 1.81717800  |
| C | 2.90256600  | 2.80119300  | -0.72095800 |
| C | 2.07161200  | 3.88135600  | -1.05595700 |
| H | 1.01260100  | 3.84494100  | -0.81953500 |
| C | 2.59039100  | 5.00635400  | -1.69019100 |
| H | 1.92904900  | 5.83265600  | -1.93783700 |
| C | 3.94589600  | 5.07055400  | -2.01076400 |
| H | 4.35020000  | 5.94975800  | -2.50621900 |
| C | 4.77844600  | 4.00194000  | -1.68837200 |
| H | 5.83841300  | 4.04234000  | -1.92699400 |
| C | 4.26267900  | 2.87636500  | -1.04621100 |
| H | 4.93155200  | 2.06248500  | -0.78568500 |
| C | 3.62951700  | 0.47650500  | 0.82205800  |
| C | 3.98696500  | 0.58747400  | 2.16985600  |
| H | 3.36884200  | 1.16544400  | 2.84888600  |
| C | 5.12492100  | -0.05880600 | 2.65103200  |
| H | 5.38796300  | 0.03245600  | 3.70197500  |
| C | 5.91579000  | -0.82231200 | 1.79508100  |
| H | 6.80208500  | -1.32565400 | 2.17374400  |
| C | 5.55985500  | -0.94864600 | 0.45253300  |
| H | 6.15900900  | -1.55700800 | -0.21984900 |
| C | 4.41933100  | -0.31013100 | -0.02836600 |
| H | 4.13163900  | -0.43776800 | -1.06913600 |
| C | -2.36659900 | -2.86182600 | 0.93293100  |
| C | -2.71331400 | -3.88281100 | 0.02693400  |
| C | -3.46302900 | -4.99202400 | 0.40926400  |
| H | -3.73450200 | -5.77069000 | -0.29804400 |
| C | -3.85816400 | -5.05950800 | 1.74428600  |
| H | -4.44370700 | -5.91030100 | 2.08257900  |
| C | -3.51418300 | -4.05050300 | 2.65751600  |
| H | -3.83611300 | -4.13836900 | 3.69201100  |
| C | -2.76577000 | -2.94233700 | 2.26793200  |
| H | -2.48303200 | -2.16608300 | 2.97305000  |

## 2g

|    |             |             |             |
|----|-------------|-------------|-------------|
| Pd | -0.87646200 | -0.17138500 | 1.08144000  |
| S  | 0.64364000  | -1.54881700 | 2.31173100  |
| P  | -2.16172700 | 1.28800000  | -0.21036300 |
| C  | 1.52025100  | -2.34246000 | 1.06622900  |
| Pd | 0.87627000  | -0.17140300 | -1.08138200 |

|   |             |             |             |
|---|-------------|-------------|-------------|
| P | 2.16236700  | 1.28706600  | 0.21046600  |
| S | -0.64476700 | -1.54779300 | -2.31160800 |
| N | 1.71369300  | -1.95725600 | -0.18319800 |
| N | -1.71505200 | -1.95655800 | 0.18320400  |
| C | 2.98219600  | -3.94153500 | -0.15196800 |
| C | 3.81915300  | -4.90084100 | -0.71872600 |
| H | 4.17151400  | -5.74678800 | -0.13545300 |
| C | 4.18920500  | -4.74973400 | -2.05179400 |
| H | 4.83740500  | -5.48913800 | -2.51434500 |
| C | 3.72912700  | -3.65888500 | -2.80133300 |
| H | 4.02246900  | -3.56147800 | -3.84319800 |
| C | 2.89521100  | -2.70177600 | -2.23578400 |
| H | 2.52215500  | -1.86118800 | -2.81384200 |
| C | 2.51602900  | -2.83887200 | -0.89554300 |
| C | -1.52144400 | -2.34161900 | -1.06625800 |
| C | -1.18756500 | 1.98698200  | -1.59727900 |
| C | 0.02811900  | 1.39589400  | -1.99912000 |
| C | 0.65122100  | 1.90670900  | -3.14994600 |
| H | 1.59282500  | 1.47431200  | -3.48148100 |
| C | 0.10565800  | 2.96618000  | -3.87089200 |
| H | 0.61589400  | 3.33262700  | -4.75910100 |
| C | -1.07763800 | 3.56844500  | -3.44342400 |
| H | -1.50206100 | 4.40720500  | -3.98938000 |
| C | -1.71677700 | 3.07931300  | -2.31013500 |
| H | -2.64258900 | 3.54165800  | -1.97582000 |
| C | -2.91298400 | 2.78056800  | 0.57763300  |
| C | -4.28666300 | 2.89122000  | 0.82673900  |
| H | -4.96121400 | 2.09454800  | 0.53045300  |
| C | -4.80775800 | 4.03165000  | 1.43767100  |
| H | -5.87781200 | 4.09979200  | 1.61742000  |
| C | -3.96716700 | 5.07970000  | 1.80347300  |
| H | -4.37543200 | 5.97023500  | 2.27472700  |
| C | -2.59827300 | 4.98073200  | 1.55698900  |
| H | -1.93079400 | 5.79106400  | 1.83841600  |
| C | -2.07438000 | 3.84092600  | 0.95439900  |
| H | -1.00538600 | 3.77712200  | 0.77602700  |
| C | -3.60563900 | 0.45082100  | -0.98329300 |
| C | -3.86989700 | 0.51262100  | -2.35557800 |
| H | -3.19351500 | 1.04607300  | -3.01514900 |
| C | -4.99082700 | -0.12595300 | -2.88446500 |
| H | -5.18006500 | -0.07592400 | -3.95368900 |
| C | -5.85769700 | -0.83081000 | -2.05270700 |
| H | -6.72925400 | -1.32944800 | -2.46924300 |
| C | -5.59470300 | -0.90864600 | -0.68529100 |
| H | -6.25384200 | -1.47225000 | -0.03036700 |
| C | -4.47083900 | -0.27953200 | -0.15582700 |
| H | -4.25864700 | -0.36761200 | 0.90704800  |
| C | 1.18839300  | 1.98633400  | 1.59731500  |
| C | -0.02732900 | 1.39540600  | 1.99920600  |
| C | -0.65019000 | 1.90615500  | 3.15022000  |
| H | -1.59177200 | 1.47381300  | 3.48188200  |
| C | -0.10441200 | 2.96548300  | 3.87119500  |
| H | -0.61446200 | 3.33188800  | 4.75953000  |
| C | 1.07890900  | 3.56765400  | 3.44362300  |
| H | 1.50347800  | 4.40633300  | 3.98958700  |
| C | 1.71786100  | 3.07851100  | 2.31024900  |
| H | 2.64374700  | 3.54069800  | 1.97590200  |
| C | 2.91449400  | 2.77918600  | -0.57750900 |
| C | 2.07665500  | 3.84019900  | -0.95412900 |
| H | 1.00762500  | 3.77724300  | -0.77561000 |

|   |             |             |             |
|---|-------------|-------------|-------------|
| C | 2.60134300  | 4.97959400  | -1.55680300 |
| H | 1.93445600  | 5.79047000  | -1.83805800 |
| C | 3.97026500  | 5.07749300  | -1.80355800 |
| H | 4.37913400  | 5.96771600  | -2.27487800 |
| C | 4.81009900  | 4.02877400  | -1.43792800 |
| H | 5.88017000  | 4.09604700  | -1.61790000 |
| C | 4.28821000  | 2.88876500  | -0.82689000 |
| H | 4.96219900  | 2.09158300  | -0.53069300 |
| C | 3.60570200  | 0.44912600  | 0.98361800  |
| C | 3.87011900  | 0.51115500  | 2.35585600  |
| H | 3.19411800  | 1.04519700  | 3.01534200  |
| C | 4.99070000  | -0.12796400 | 2.88481600  |
| H | 5.18006500  | -0.07775300 | 3.95401000  |
| C | 5.85706100  | -0.83359000 | 2.05317500  |
| H | 6.72835400  | -1.33263300 | 2.46977600  |
| C | 5.59391500  | -0.91163300 | 0.68580200  |
| H | 6.25264700  | -1.47583100 | 0.03097700  |
| C | 4.47039300  | -0.28196400 | 0.15626200  |
| H | 4.25808000  | -0.37016600 | -0.90657900 |
| C | -2.51758700 | -2.83820900 | 0.89526300  |
| C | -2.98373600 | -3.94070800 | 0.15143800  |
| C | -3.82099400 | -4.89993100 | 0.71789200  |
| H | -4.17335700 | -5.74576300 | 0.13444900  |
| C | -4.19129800 | -4.74893800 | 2.05090000  |
| H | -4.83977000 | -5.48826600 | 2.51319200  |
| C | -3.73118700 | -3.65827500 | 2.80069900  |
| H | -4.02472000 | -3.56099500 | 3.84252000  |
| C | -2.89700400 | -2.70123000 | 2.23545300  |
| H | -2.52386300 | -1.86078800 | 2.81367700  |
| S | -2.34243500 | -3.85354800 | -1.46832300 |
| S | 2.34125700  | -3.85456500 | 1.46795000  |

## 2h

|    |             |             |             |
|----|-------------|-------------|-------------|
| Pd | 0.65631300  | -0.59943800 | -1.24818600 |
| S  | -0.99656000 | -2.02177600 | -2.26089400 |
| P  | 2.12695200  | 0.86575400  | -0.19423900 |
| N  | 1.60533500  | -2.33711200 | -0.43295200 |
| C  | -1.63595100 | -2.75093500 | -0.84482800 |
| Pd | -0.65646800 | -0.59944000 | 1.24806400  |
| P  | -2.12700300 | 0.86564300  | 0.19402100  |
| S  | 0.99652400  | -2.02163600 | 2.26100200  |
| N  | -1.60525500 | -2.33737200 | 0.43306800  |
| C  | 1.63614700  | -2.75062200 | 0.84495100  |
| N  | 2.26171400  | -3.24370400 | -1.18333400 |
| C  | 2.66288400  | -4.78323700 | 1.92447800  |
| H  | 1.76256300  | -4.99172100 | 2.50847300  |
| H  | 3.40752200  | -4.30847100 | 2.57014000  |
| H  | 3.06615300  | -5.70514800 | 1.50471600  |
| N  | 2.70891900  | -4.19207600 | -0.44634600 |
| C  | -2.66198100 | -4.78398400 | -1.92423600 |
| H  | -1.76153100 | -4.99240700 | -2.50805400 |
| H  | -3.40660400 | -4.30944500 | -2.57008300 |
| H  | -3.06516000 | -5.70590700 | -1.50441900 |
| N  | 2.32833800  | -3.91363300 | 0.82140400  |
| N  | -2.26145500 | -3.24406500 | 1.18347000  |
| N  | -2.70825200 | -4.19267600 | 0.44653900  |
| N  | -2.32775800 | -3.91417000 | -0.82123100 |
| C  | 1.44555200  | 1.56718400  | 1.35663900  |
| C  | 0.34378500  | 0.96408200  | 1.99912400  |



|   |             |             |             |
|---|-------------|-------------|-------------|
| C | -0.03858600 | 1.46885300  | 3.25239700  |
| H | -0.88472200 | 1.02219200  | 3.76964800  |
| C | 0.62829300  | 2.53818700  | 3.84489800  |
| H | 0.30527200  | 2.90236000  | 4.81781600  |
| C | 1.69302700  | 3.15278700  | 3.18514900  |
| H | 2.20848100  | 3.99894000  | 3.63249400  |
| C | 2.09707200  | 2.66666200  | 1.94703700  |
| H | 2.93138300  | 3.13712800  | 1.43203600  |
| C | 3.68885800  | 0.01823600  | 0.28301900  |
| C | 4.25119300  | 0.12697100  | 1.55923900  |
| H | 3.74688000  | 0.70358000  | 2.32776100  |
| C | 5.45247000  | -0.51715000 | 1.85420400  |
| H | 5.87687900  | -0.42757300 | 2.85107900  |
| C | 6.10272100  | -1.27411700 | 0.88202400  |
| H | 7.03904900  | -1.77484300 | 1.11569100  |
| C | 5.54188500  | -1.39843000 | -0.38907700 |
| H | 6.03104700  | -2.00225400 | -1.14874400 |
| C | 4.33795000  | -0.76376400 | -0.68424600 |
| H | 3.88955100  | -0.89265000 | -1.66654100 |
| C | 2.72495000  | 2.34634200  | -1.12055000 |
| C | 4.02036600  | 2.42956000  | -1.64621600 |
| H | 4.72580600  | 1.61971200  | -1.49028000 |
| C | 4.42499200  | 3.55764100  | -2.35954700 |
| H | 5.43599200  | 3.60463500  | -2.75646800 |
| C | 3.54575800  | 4.62001900  | -2.55282900 |
| H | 3.86428500  | 5.50072200  | -3.10482700 |
| C | 2.25495000  | 4.54806200  | -2.03041000 |
| H | 1.55857400  | 5.36982800  | -2.17570800 |
| C | 1.84552700  | 3.42029400  | -1.32529600 |
| H | 0.83443400  | 3.37624800  | -0.93257300 |
| C | -1.44558000 | 1.56725700  | -1.35676200 |
| C | -0.34397400 | 0.96397000  | -1.99938100 |
| C | 0.03829500  | 1.46867600  | -3.25270800 |
| H | 0.88420500  | 1.02179300  | -3.77013900 |
| C | -0.62840400 | 2.53821000  | -3.84505900 |
| H | -0.30541000 | 2.90237600  | -4.81798900 |
| C | -1.69287700 | 3.15305400  | -3.18512000 |
| H | -2.20815400 | 3.99938800  | -3.63232800 |
| C | -2.09691300 | 2.66691900  | -1.94700700 |
| H | -2.93108800 | 3.13750000  | -1.43189500 |
| C | -2.72501400 | 2.34602600  | 1.12066700  |
| C | -4.02011400 | 2.42863800  | 1.64720900  |
| H | -4.72533700 | 1.61853300  | 1.49160300  |
| C | -4.42472000 | 3.55642800  | 2.36101200  |
| H | -5.43547400 | 3.60294400  | 2.75861000  |
| C | -3.54578000 | 4.61911800  | 2.55391300  |
| H | -3.86428500 | 5.49958800  | 3.10629700  |
| C | -2.25528900 | 4.54777200  | 2.03062600  |
| H | -1.55915100 | 5.36979300  | 2.17562600  |
| C | -1.84588500 | 3.42029600  | 1.32504300  |
| H | -0.83504000 | 3.37672400  | 0.93162300  |
| C | -3.68895800 | 0.01828400  | -0.28343500 |
| C | -4.25154000 | 0.12767300  | -1.55949200 |
| H | -3.74733900 | 0.70459800  | -2.32784900 |
| C | -5.45290000 | -0.51624500 | -1.85454000 |
| H | -5.87749900 | -0.42616600 | -2.85129100 |
| C | -6.10300300 | -1.27366100 | -0.88260600 |
| H | -7.03938600 | -1.77424100 | -1.11636600 |
| C | -5.54195300 | -1.39859500 | 0.38833200  |
| H | -6.03101500 | -2.00273200 | 1.14781500  |

|   |             |             |            |
|---|-------------|-------------|------------|
| C | -4.33793700 | -0.76410900 | 0.68358700 |
| H | -3.88941100 | -0.89342700 | 1.66576400 |

### 3a

|    |             |             |             |
|----|-------------|-------------|-------------|
| Pd | 0.78185500  | 0.48168200  | 1.04013800  |
| P  | 2.26992200  | -0.86048600 | -0.17217000 |
| S  | -0.84865100 | 1.68521100  | 2.27379500  |
| N  | 1.53621800  | 2.42132300  | 0.23498600  |
| C  | -1.53818400 | 2.74615500  | 1.07787400  |
| Pd | -0.78179200 | 0.48173200  | -1.04014600 |
| P  | -2.26992300 | -0.86042100 | 0.17214600  |
| S  | 0.84884500  | 1.68518800  | -2.27373500 |
| N  | -1.53607200 | 2.42138700  | -0.23491100 |
| C  | -2.09252800 | 3.96644800  | 1.51450700  |
| H  | -2.07989400 | 4.19114000  | 2.57601500  |
| C  | -2.60381600 | 4.86030900  | 0.59413800  |
| H  | -3.02790100 | 5.80502500  | 0.92562500  |
| C  | -2.53539900 | 4.54274700  | -0.76471200 |
| H  | -2.89656800 | 5.21994000  | -1.53173700 |
| C  | -1.99234400 | 3.32348600  | -1.12819300 |
| H  | -1.92890900 | 3.01975800  | -2.16599700 |
| C  | 1.53833300  | 2.74613100  | -1.07778600 |
| C  | 2.09264800  | 3.96645100  | -1.51438000 |
| H  | 2.08001400  | 4.19117700  | -2.57588000 |
| C  | 2.60391600  | 4.86029200  | -0.59397900 |
| H  | 3.02797900  | 5.80502700  | -0.92543500 |
| C  | 2.53550400  | 4.54268300  | 0.76485700  |
| H  | 2.89665700  | 5.21985800  | 1.53190600  |
| C  | 1.99246600  | 3.32340100  | 1.12830200  |
| H  | 1.92903800  | 3.01964100  | 2.16610000  |
| C  | 1.35840300  | -1.67277900 | -1.51095900 |
| C  | 0.08403300  | -1.19577800 | -1.87624400 |
| C  | -0.56669100 | -1.83869200 | -2.93762300 |
| H  | -1.54517700 | -1.49903800 | -3.25178000 |
| C  | 0.02795700  | -2.90233900 | -3.61579100 |
| H  | -0.51001100 | -3.36642700 | -4.43924800 |
| C  | 1.28649300  | -3.36948200 | -3.24805500 |
| H  | 1.75021200  | -4.19970200 | -3.77454100 |
| C  | 1.94421900  | -2.75516000 | -2.19089600 |
| H  | 2.92222700  | -3.11401700 | -1.87979200 |
| C  | 3.67809200  | 0.05257600  | -0.91484500 |
| C  | 4.03982100  | -0.13131500 | -2.25498700 |
| H  | 3.45180200  | -0.78018000 | -2.89560500 |
| C  | 5.14466200  | 0.53591600  | -2.77862600 |
| H  | 5.41410500  | 0.38784800  | -3.82121500 |
| C  | 5.89321100  | 1.39507300  | -1.97582800 |
| H  | 6.75421200  | 1.91495900  | -2.38862800 |
| C  | 5.52730700  | 1.59352200  | -0.64588700 |
| H  | 6.09713800  | 2.27159000  | -0.01579400 |
| C  | 4.42135400  | 0.93253200  | -0.11504900 |
| H  | 4.12621800  | 1.10443200  | 0.91729800  |
| C  | 3.06051500  | -2.23337300 | 0.76008700  |
| C  | 4.30950300  | -2.06997300 | 1.37265800  |
| H  | 4.84106400  | -1.12900600 | 1.28880900  |
| C  | 4.88603400  | -3.11610100 | 2.08914700  |
| H  | 5.85698100  | -2.97216900 | 2.55568800  |
| C  | 4.22543400  | -4.33716400 | 2.20554500  |
| H  | 4.68002400  | -5.15365400 | 2.76095200  |
| C  | 2.97877300  | -4.50643200 | 1.60591500  |

|    |             |             |             |
|----|-------------|-------------|-------------|
| H  | 2.45236800  | -5.45335200 | 1.69342600  |
| C  | 2.39584900  | -3.46097200 | 0.89481500  |
| H  | 1.42225400  | -3.60379000 | 0.43719700  |
| C  | -1.35842500 | -1.67277900 | 1.51090600  |
| C  | -0.08404700 | -1.19580800 | 1.87621500  |
| C  | 0.56665700  | -1.83877400 | 2.93757300  |
| H  | 1.54514900  | -1.49914900 | 3.25173800  |
| C  | -0.02800600 | -2.90243600 | 3.61570000  |
| H  | 0.50995700  | -3.36655900 | 4.43914000  |
| C  | -1.28654900 | -3.36954800 | 3.24794300  |
| H  | -1.75027400 | -4.19979200 | 3.77438600  |
| C  | -1.94426200 | -2.75517200 | 2.19080600  |
| H  | -2.92227100 | -3.11400700 | 1.87967800  |
| C  | -3.67808400 | 0.05265800  | 0.91479400  |
| C  | -4.42133900 | 0.93257600  | 0.11495000  |
| H  | -4.12617600 | 1.10445000  | -0.91739400 |
| C  | -5.52730500 | 1.59358200  | 0.64574300  |
| H  | -6.09713000 | 2.27162300  | 0.01561600  |
| C  | -5.89322900 | 1.39517200  | 1.97568100  |
| H  | -6.75424200 | 1.91506300  | 2.38845000  |
| C  | -5.14469700 | 0.53603800  | 2.77852400  |
| H  | -5.41416200 | 0.38801300  | 3.82111500  |
| C  | -4.03984500 | -0.13120500 | 2.25493300  |
| H  | -3.45183900 | -0.78006400 | 2.89557200  |
| C  | -3.06062900 | -2.23323000 | -0.76012400 |
| C  | -4.30959500 | -2.06970000 | -1.37270400 |
| H  | -4.84103600 | -1.12866400 | -1.28887800 |
| C  | -4.88623900 | -3.11577500 | -2.08917200 |
| H  | -5.85716500 | -2.97174200 | -2.55572600 |
| C  | -4.22578300 | -4.33692200 | -2.20552600 |
| H  | -4.68046800 | -5.15336900 | -2.76091700 |
| C  | -2.97914700 | -4.50632400 | -1.60588000 |
| H  | -2.45285400 | -5.45331000 | -1.69334900 |
| C  | -2.39610700 | -3.46091200 | -0.89480300 |
| H  | -1.42253100 | -3.60383700 | -0.43717500 |
| Cl | 2.45020800  | 0.70772600  | 2.87557200  |
| Cl | -2.45017200 | 0.70791400  | -2.87544000 |

### 3b

|    |             |             |             |
|----|-------------|-------------|-------------|
| Pd | 0.77831400  | -0.41236700 | -1.03184300 |
| P  | 2.28254300  | 0.94971700  | 0.17207900  |
| S  | -1.01836600 | -1.41181500 | -2.19975700 |
| N  | 1.53472600  | -2.46538800 | -0.23648200 |
| C  | -1.66336000 | -2.60388600 | -1.10180800 |
| Pd | -0.78187400 | -0.42049600 | 1.03516700  |
| S  | 1.01194100  | -1.40858100 | 2.21253800  |
| P  | -2.29904900 | 0.92546900  | -0.17264000 |
| N  | -1.50169800 | -2.50029500 | 0.24078000  |
| C  | -2.36447900 | -3.66848700 | -1.69420500 |
| H  | -2.47187900 | -3.68919900 | -2.77348300 |
| C  | -2.88273500 | -4.66294400 | -0.89041100 |
| H  | -3.44471300 | -5.48859100 | -1.32023700 |
| C  | -2.62183100 | -4.61234200 | 0.47481300  |
| H  | -2.95051300 | -5.40830600 | 1.13521500  |
| C  | -1.90143200 | -3.54716800 | 1.01657100  |
| C  | -1.49741400 | -3.65405500 | 2.45731900  |
| H  | -1.49314400 | -2.69753800 | 2.97340200  |
| H  | -0.48596200 | -4.07515700 | 2.51252700  |
| H  | -2.17324600 | -4.33745700 | 2.98073100  |

|   |             |             |             |
|---|-------------|-------------|-------------|
| C | 1.70076500  | -2.56795600 | 1.10719800  |
| C | 2.43866900  | -3.61045000 | 1.69331400  |
| H | 2.54891700  | -3.63223600 | 2.77237200  |
| C | 2.99164800  | -4.58298000 | 0.88452400  |
| H | 3.58189300  | -5.39037500 | 1.31110400  |
| C | 2.73115900  | -4.53397500 | -0.47981200 |
| H | 3.08770000  | -5.31358200 | -1.14590600 |
| C | 1.33448700  | 1.77070800  | 1.48588800  |
| C | 0.05660800  | 1.29099600  | 1.83924900  |
| C | -0.61516600 | 1.92996100  | 2.88651200  |
| H | -1.59229400 | 1.57925600  | 3.19228300  |
| C | -0.04112000 | 3.00673900  | 3.56387500  |
| H | -0.59504500 | 3.46893100  | 4.37759800  |
| C | 1.21386600  | 3.48610400  | 3.20557900  |
| H | 1.66178200  | 4.32682600  | 3.72904100  |
| C | 1.89256500  | 2.86863800  | 2.16226900  |
| H | 2.86898500  | 3.23890400  | 1.86022800  |
| C | 1.97376000  | -3.49131800 | -1.01607800 |
| C | 1.58377300  | -3.61477400 | -2.46079900 |
| H | 1.26285100  | -2.67950300 | -2.90543600 |
| H | 0.75719700  | -4.33433600 | -2.53532900 |
| H | 2.42153200  | -4.01010100 | -3.04395100 |
| C | 3.05540300  | 2.33640800  | -0.76140700 |
| C | 4.30321300  | 2.17860000  | -1.37890300 |
| H | 4.83448100  | 1.23684500  | -1.30310000 |
| C | 4.87712100  | 3.22878400  | -2.09113700 |
| H | 5.84673100  | 3.08772600  | -2.56139100 |
| C | 4.21560100  | 4.45027500  | -2.19916000 |
| H | 4.66827200  | 5.27031700  | -2.75097800 |
| C | 2.97060100  | 4.61480500  | -1.59530400 |
| H | 2.44277500  | 5.56160200  | -1.67595500 |
| C | 2.39052600  | 3.56455800  | -0.88836700 |
| H | 1.41781200  | 3.70496000  | -0.42851600 |
| C | 3.72591100  | 0.10065600  | 0.92908100  |
| C | 4.46077200  | -0.80811800 | 0.15589100  |
| H | 4.13231500  | -1.04617200 | -0.85282500 |
| C | 5.60509400  | -1.40680300 | 0.68176000  |
| H | 6.16837100  | -2.10785700 | 0.07120200  |
| C | 6.01760000  | -1.11635200 | 1.97990900  |
| H | 6.90902600  | -1.58597300 | 2.38840500  |
| C | 5.27559300  | -0.22844000 | 2.75858700  |
| H | 5.58120700  | -0.00849400 | 3.77838500  |
| C | 4.13423900  | 0.37697200  | 2.23981200  |
| H | 3.55266800  | 1.04777700  | 2.86366900  |
| C | -1.35854000 | 1.75696200  | -1.48598600 |
| C | -0.07601500 | 1.28954400  | -1.83907200 |
| C | 0.58953000  | 1.93328900  | -2.88731600 |
| H | 1.56962700  | 1.59069200  | -3.19310800 |
| C | 0.00538700  | 3.00430100  | -3.56525500 |
| H | 0.55437700  | 3.47084300  | -4.37983900 |
| C | -1.25349000 | 3.47276500  | -3.20614800 |
| H | -1.70906800 | 4.30931600  | -3.72970200 |
| C | -1.92651400 | 2.84971900  | -2.16236500 |
| H | -2.90603600 | 3.21148600  | -1.86013200 |
| C | -3.08788400 | 2.30461100  | 0.75891700  |
| C | -2.43543200 | 3.53904400  | 0.88902700  |
| H | -1.46242100 | 3.68916200  | 0.43286000  |
| C | -3.02828500 | 4.58328900  | 1.59428800  |
| H | -2.50993800 | 5.53510500  | 1.67742100  |
| C | -4.27397000 | 4.40646500  | 2.19323600  |

|    |             |             |             |
|----|-------------|-------------|-------------|
| H  | -4.73664800 | 5.22179300  | 2.74374300  |
| C  | -4.92331700 | 3.17873000  | 2.08193800  |
| H  | -5.89334300 | 3.02806400  | 2.54834500  |
| C  | -4.33655500 | 2.13453800  | 1.37141300  |
| H  | -4.85815400 | 1.18756600  | 1.29298100  |
| C  | -3.73356200 | 0.06138900  | -0.93012200 |
| C  | -4.14980900 | 0.34092300  | -2.23774700 |
| H  | -3.57956300 | 1.02399500  | -2.85877100 |
| C  | -5.28353000 | -0.27735700 | -2.75777400 |
| H  | -5.59504900 | -0.05477900 | -3.77521700 |
| C  | -6.01016500 | -1.18181100 | -1.98357000 |
| H  | -6.89546300 | -1.66195900 | -2.39313200 |
| C  | -5.59019700 | -1.47467800 | -0.68841700 |
| H  | -6.14171800 | -2.18776300 | -0.08105600 |
| C  | -4.45355700 | -0.86259100 | -0.16106400 |
| H  | -4.12059800 | -1.10120300 | 0.84593100  |
| Cl | 2.53041500  | -0.56041200 | -2.80585900 |
| Cl | -2.54123500 | -0.57078200 | 2.80639200  |

### 3c

|    |             |             |             |
|----|-------------|-------------|-------------|
| Pd | -0.87948000 | -0.05921500 | 0.94896100  |
| Pd | 0.88010100  | -0.06055900 | -0.94928300 |
| P  | -2.26169300 | 1.29809800  | -0.38912800 |
| P  | 2.26398600  | 1.29493500  | 0.38905800  |
| S  | 0.75638900  | -1.08173300 | 2.31337100  |
| S  | -0.75642800 | -1.08147900 | -2.31404300 |
| N  | 1.55742300  | -2.11146100 | -0.05631000 |
| N  | -1.55991900 | -2.10810900 | 0.05614700  |
| C  | -4.39101400 | -0.50966300 | -0.58816100 |
| H  | -4.15237800 | -0.75308700 | 0.44426900  |
| C  | 1.19984500  | 2.11915600  | 1.60709300  |
| C  | 0.10947900  | 1.64244000  | -1.83988700 |
| C  | -0.10675200 | 1.64280200  | 1.83959700  |
| C  | -3.13336700 | 2.67469400  | 0.46419300  |
| C  | 2.08575100  | -3.15862700 | -0.79921800 |
| C  | 4.39010000  | -0.51661900 | 0.58829000  |
| H  | 4.15076600  | -0.76003800 | -0.44396900 |
| C  | 3.61339100  | 0.42239000  | 1.28087600  |
| C  | -1.19643400 | 2.12061500  | -1.60732200 |
| C  | 1.54540200  | -2.22970500 | 1.27310700  |
| C  | 2.75666700  | -4.25268100 | -0.16973400 |
| C  | -2.09102300 | -3.15354200 | 0.79952600  |
| C  | 3.13778600  | 2.67019800  | -0.46422800 |
| C  | 1.69533300  | 3.21703500  | 2.33170500  |
| H  | 2.69587900  | 3.58572300  | 2.12007500  |
| C  | 2.19524400  | -3.30031400 | 1.95796700  |
| H  | 2.16571400  | -3.31101500 | 3.04222900  |
| C  | -3.61235500 | 0.42756400  | -1.28100000 |
| C  | -2.20237800 | -3.29530600 | -1.95757400 |
| H  | -2.17330700 | -3.30639100 | -3.04184600 |
| C  | -1.95783800 | -3.19387000 | 2.20567000  |
| H  | -1.41806300 | -2.40378000 | 2.70486900  |
| C  | 2.81901000  | -4.27659800 | 1.24560700  |
| H  | 3.32959400  | -5.09662700 | 1.74617900  |
| C  | 3.90756200  | 0.70628800  | 2.62034300  |
| H  | 3.29259400  | 1.40342700  | 3.17998100  |
| C  | 5.46142300  | -1.14129800 | 1.22561700  |
| H  | 6.05703000  | -1.86704200 | 0.67798500  |
| C  | -2.49491900 | 3.90779800  | 0.65898600  |

|   |             |             |             |
|---|-------------|-------------|-------------|
| H | -1.48170800 | 4.05755800  | 0.30077000  |
| C | -0.87012000 | 2.28446100  | 2.82058900  |
| H | -1.87170100 | 1.93526300  | 3.03577800  |
| C | 1.95398800  | -3.19844200 | -2.20552400 |
| H | 1.41802600  | -2.40608700 | -2.70527000 |
| C | -1.54876300 | -2.22663600 | -1.27326200 |
| C | -1.69044500 | 3.21909400  | -2.33204000 |
| H | -2.69050000 | 3.58911900  | -2.12042700 |
| C | 2.50115000  | 3.90418900  | -0.65930000 |
| H | 1.48804900  | 4.05541200  | -0.30138100 |
| C | 0.87366900  | 2.28293300  | -2.82098600 |
| H | 1.87473400  | 1.93231900  | -3.03624600 |
| C | 3.30865500  | -5.29491900 | -0.94812300 |
| H | 3.81921500  | -6.10761700 | -0.43578500 |
| C | 4.97717300  | 0.07523600  | 3.24993800  |
| H | 5.19385100  | 0.30065700  | 4.29107500  |
| C | -3.90550300 | 0.71118400  | -2.62074500 |
| H | -3.28903100 | 1.40684000  | -3.18057500 |
| C | -4.43504900 | 2.50342400  | 0.95358300  |
| H | -4.94651800 | 1.55647000  | 0.82334700  |
| C | -2.76621000 | -4.24525800 | 0.17062200  |
| C | 5.09264400  | 3.53950400  | -1.60579500 |
| H | 6.10291700  | 3.38735000  | -1.97630300 |
| C | -0.35959900 | 3.36110900  | 3.54688400  |
| H | -0.98636400 | 3.82564200  | 4.30448900  |
| C | 4.43940600  | 2.49705200  | -0.95315400 |
| H | 4.94945300  | 1.54936300  | -0.82266700 |
| C | -4.97609200 | 0.08177100  | -3.25032900 |
| H | -5.19198700 | 0.30698200  | -4.29167500 |
| C | -3.15255100 | 4.95115300  | 1.30551800  |
| H | -2.64426800 | 5.90250800  | 1.44001400  |
| C | -4.45022100 | 4.77409800  | 1.78119400  |
| H | -4.96341000 | 5.58887600  | 2.28578200  |
| C | 2.48680300  | -4.23786600 | -2.93912800 |
| H | 2.36364800  | -4.23542000 | -4.01905200 |
| C | -2.82929500 | -4.26919600 | -1.24470600 |
| H | -3.34299300 | -5.08751500 | -1.74489100 |
| C | -5.08659600 | 3.54683500  | 1.60638800  |
| H | -6.09695500 | 3.39611200  | 1.97724600  |
| C | 4.45804800  | 4.76765300  | -1.78089500 |
| H | 4.97256600  | 5.58168800  | -2.28533200 |
| C | 0.92425800  | 3.83786000  | 3.30627100  |
| H | 1.32317200  | 4.67908000  | 3.86716700  |
| C | 5.75938800  | -0.84581500 | 2.55384300  |
| H | 6.59338800  | -1.33686300 | 3.04920000  |
| C | 0.36461300  | 3.36025800  | -3.54731700 |
| H | 0.99201400  | 3.82388400  | -4.30495000 |
| C | -0.91857600 | 3.83879200  | -3.30669200 |
| H | -1.31637200 | 4.68050900  | -3.86763500 |
| C | -3.32137800 | -5.28541200 | 0.94953500  |
| H | -3.83522100 | -6.09634600 | 0.43768200  |
| C | -5.46330800 | -1.13268300 | -1.22547100 |
| H | -6.06042200 | -1.85703100 | -0.67763700 |
| C | -2.49381800 | -4.23131700 | 2.93977600  |
| H | -2.36948900 | -4.22943900 | 4.01956900  |
| C | 3.18356500  | -5.29113400 | -2.31808400 |
| H | 3.60392200  | -6.09727200 | -2.91339000 |
| C | -5.76029500 | -0.83737200 | -2.55395700 |
| H | -6.59506500 | -1.32711400 | -3.04931000 |
| C | -3.19517500 | -5.28193200 | 2.31940200  |

|    |             |             |             |
|----|-------------|-------------|-------------|
| H  | -3.61802000 | -6.08645500 | 2.91513000  |
| C  | 3.16047300  | 4.94658000  | -1.30566900 |
| H  | 2.65360300  | 5.89866000  | -1.44037100 |
| Cl | -2.77747200 | -0.20664800 | 2.55876000  |
| Cl | 2.77795800  | -0.21003300 | -2.55871600 |

### 3d

|    |             |             |             |
|----|-------------|-------------|-------------|
| Pd | 0.77141700  | 0.49172900  | 1.04475400  |
| P  | 2.26795500  | -0.85921900 | -0.15599000 |
| S  | -0.82905500 | 1.72763900  | 2.28643100  |
| N  | 1.53442700  | 2.41474900  | 0.22810800  |
| C  | -1.58387600 | 2.73202000  | 1.09126200  |
| Pd | -0.77138500 | 0.49173300  | -1.04481800 |
| P  | -2.26795200 | -0.85918800 | 0.15599000  |
| S  | 0.82918600  | 1.72760200  | -2.28643700 |
| N  | -1.53439200 | 2.41474000  | -0.22810700 |
| C  | -2.69566400 | 4.68827900  | 0.69475600  |
| H  | -3.20014900 | 5.55848400  | 1.11377300  |
| C  | -2.57619500 | 4.51367500  | -0.68320700 |
| H  | -2.94196800 | 5.24135400  | -1.39864700 |
| C  | -1.98830100 | 3.33189000  | -1.10036200 |
| H  | -1.89033500 | 3.07344200  | -2.14854500 |
| C  | 1.58391600  | 2.73203500  | -1.09125500 |
| C  | 2.69558600  | 4.68835800  | -0.69472000 |
| H  | 3.20003400  | 5.55858900  | -1.11372700 |
| C  | 2.57611500  | 4.51373400  | 0.68323800  |
| H  | 2.94184600  | 5.24141900  | 1.39869400  |
| C  | 1.98828400  | 3.33191000  | 1.10037900  |
| H  | 1.89034000  | 3.07343700  | 2.14856400  |
| C  | 1.36642400  | -1.66303400 | -1.50561500 |
| C  | 0.10106800  | -1.17565500 | -1.88649700 |
| C  | -0.53830500 | -1.80419800 | -2.96335800 |
| H  | -1.50958700 | -1.45517600 | -3.28964300 |
| C  | 0.05931500  | -2.86698600 | -3.63987800 |
| H  | -0.46843000 | -3.32067300 | -4.47558700 |
| C  | 1.30819500  | -3.34701800 | -3.25505300 |
| H  | 1.77352900  | -4.17694900 | -3.78045500 |
| C  | 1.95471700  | -2.74520100 | -2.18414200 |
| H  | 2.92627600  | -3.11186000 | -1.86213400 |
| C  | 3.67888500  | 0.05537700  | -0.89036200 |
| C  | 4.02162600  | -0.09736400 | -2.23943500 |
| H  | 3.42013100  | -0.72507400 | -2.88835100 |
| C  | 5.12464700  | 0.57472500  | -2.76085900 |
| H  | 5.37724000  | 0.45323300  | -3.81087500 |
| C  | 5.89094600  | 1.40668500  | -1.94703700 |
| H  | 6.74985600  | 1.93072100  | -2.35858400 |
| C  | 5.54403600  | 1.57529000  | -0.60776700 |
| H  | 6.12873200  | 2.23204500  | 0.03132000  |
| C  | 4.43887300  | 0.91138400  | -0.07922200 |
| H  | 4.15673800  | 1.06259400  | 0.96009400  |
| C  | 3.04350500  | -2.23684600 | 0.78005700  |
| C  | 4.29850000  | -2.09260400 | 1.38485000  |
| H  | 4.84782700  | -1.16275400 | 1.29189500  |
| C  | 4.86002500  | -3.14552000 | 2.10343900  |
| H  | 5.83609700  | -3.01700500 | 2.56368400  |
| C  | 4.17844600  | -4.35401400 | 2.22901200  |
| H  | 4.62132200  | -5.17575500 | 2.78605100  |
| C  | 2.92622300  | -4.50442200 | 1.63583200  |
| H  | 2.38409000  | -5.44173600 | 1.72995000  |

|    |             |             |             |
|----|-------------|-------------|-------------|
| C  | 2.35820700  | -3.45226700 | 0.92275500  |
| H  | 1.38031200  | -3.58019700 | 0.46969800  |
| C  | -1.36640200 | -1.66303900 | 1.50557400  |
| C  | -0.10103200 | -1.17567200 | 1.88643400  |
| C  | 0.53838400  | -1.80427300 | 2.96323300  |
| H  | 1.50967600  | -1.45526100 | 3.28949700  |
| C  | -0.05920800 | -2.86709400 | 3.63972500  |
| H  | 0.46858100  | -3.32083300 | 4.47537900  |
| C  | -1.30811800 | -3.34709000 | 3.25494500  |
| H  | -1.77342100 | -4.17706100 | 3.78031400  |
| C  | -1.95468500 | -2.74521300 | 2.18409600  |
| H  | -2.92625700 | -3.11185800 | 1.86210700  |
| C  | -3.67886100 | 0.05539100  | 0.89039900  |
| C  | -4.43886800 | 0.91141500  | 0.07929200  |
| H  | -4.15674200 | 1.06266400  | -0.96001700 |
| C  | -5.54400900 | 1.57531900  | 0.60788100  |
| H  | -6.12871500 | 2.23209200  | -0.03117700 |
| C  | -5.89087500 | 1.40669900  | 1.94715800  |
| H  | -6.74977300 | 1.93072700  | 2.35874000  |
| C  | -5.12455900 | 0.57472200  | 2.76094900  |
| H  | -5.37712700 | 0.45321800  | 3.81097000  |
| C  | -4.02156000 | -0.09736600 | 2.23948600  |
| H  | -3.42005700 | -0.72510900 | 2.88836500  |
| C  | -3.04357800 | -2.23677100 | -0.78005600 |
| C  | -4.29860000 | -2.09247800 | -1.38478100 |
| H  | -4.84790000 | -1.16261700 | -1.29176900 |
| C  | -4.86019600 | -3.14536000 | -2.10336200 |
| H  | -5.83628700 | -3.01680100 | -2.56355700 |
| C  | -4.17867000 | -4.35387600 | -2.22898000 |
| H  | -4.62159500 | -5.17558600 | -2.78602300 |
| C  | -2.92643100 | -4.50434900 | -1.63584800 |
| H  | -2.38434600 | -5.44169100 | -1.72998700 |
| C  | -2.35834300 | -3.45222400 | -0.92278100 |
| H  | -1.38044000 | -3.58020400 | -0.46975500 |
| N  | 2.19217200  | 3.82926300  | -1.56953000 |
| N  | -2.19219800 | 3.82920300  | 1.56955300  |
| Cl | 2.43174400  | 0.74746300  | 2.87812400  |
| Cl | -2.43178500 | 0.74745700  | -2.87803400 |

### 3e

|    |             |             |             |
|----|-------------|-------------|-------------|
| Pd | -0.75323600 | -0.46256900 | 1.09599500  |
| P  | -2.23383300 | 0.90373300  | -0.07948700 |
| S  | 0.88118300  | -1.74227000 | 2.30269800  |
| N  | 1.56781700  | -2.28555000 | -0.29381800 |
| C  | 1.51369400  | -2.66464500 | 0.98605900  |
| Pd | 0.75325600  | -0.46272400 | -1.09593900 |
| P  | 2.23407000  | 0.90337500  | 0.07953300  |
| S  | -0.88128500 | -1.74219400 | -2.30260000 |
| C  | 2.10886100  | -3.32657600 | -1.01115500 |
| H  | 2.24750600  | -3.24732100 | -2.07833900 |
| C  | 2.16326100  | -4.66941700 | 2.33632700  |
| H  | 1.35382200  | -4.38523700 | 3.01322300  |
| H  | 3.12206400  | -4.46002300 | 2.82285600  |
| H  | 2.09441500  | -5.73754500 | 2.11617800  |
| C  | -1.51418300 | -2.66431300 | -0.98595500 |
| C  | 2.41547800  | -4.34056900 | -0.15341500 |
| H  | 2.87493500  | -5.30452600 | -0.31410600 |
| N  | 2.02845700  | -3.92170300 | 1.10524700  |
| C  | -2.16535500 | -4.66846200 | -2.33641200 |



|   |             |             |             |
|---|-------------|-------------|-------------|
| H | -2.09648500 | -5.73666600 | -2.11661000 |
| H | -1.35634700 | -4.38420600 | -3.01377900 |
| H | -3.12446700 | -4.45881000 | -2.82221400 |
| N | -1.56806900 | -2.28529400 | 0.29395900  |
| C | -2.10961500 | -3.32610900 | 1.01122200  |
| H | -2.24812500 | -3.24690300 | 2.07842600  |
| C | -2.41693500 | -4.33980600 | 0.15339200  |
| H | -2.87643500 | -5.30374000 | 0.31408500  |
| N | -2.02963400 | -3.92108000 | -1.10523200 |
| C | -1.37946400 | 1.71086500  | -1.45940900 |
| C | -0.14710700 | 1.19953600  | -1.91027800 |
| C | 0.43418500  | 1.81373800  | -3.02868000 |
| H | 1.37900200  | 1.44431700  | -3.40881400 |
| C | -0.18297400 | 2.88480100  | -3.67280700 |
| H | 0.30018400  | 3.32697800  | -4.54125000 |
| C | -1.39623300 | 3.39114200  | -3.21239100 |
| H | -1.87595200 | 4.23026100  | -3.70982700 |
| C | -1.98904900 | 2.80280800  | -2.10357900 |
| H | -2.93440500 | 3.18578400  | -1.72712700 |
| C | -3.66865700 | -0.00134800 | -0.78225000 |
| C | -4.41290100 | -0.85859300 | 0.04131000  |
| H | -4.10265400 | -1.02255800 | 1.07034500  |
| C | -5.53408900 | -1.51293900 | -0.46419500 |
| H | -6.10541300 | -2.17167800 | 0.18493200  |
| C | -5.91446700 | -1.33244400 | -1.79336700 |
| H | -6.78935300 | -1.84553000 | -2.18544500 |
| C | -5.16374100 | -0.49931300 | -2.62031900 |
| H | -5.44360800 | -0.36525900 | -3.66212700 |
| C | -4.04293800 | 0.16174300  | -2.12138400 |
| H | -3.45422900 | 0.79123900  | -2.78008600 |
| C | -2.98357800 | 2.27739000  | 0.88400200  |
| C | -2.28763900 | 3.48716500  | 1.02267200  |
| H | -1.31709900 | 3.61123000  | 0.55288600  |
| C | -2.83517300 | 4.53788700  | 1.75340000  |
| H | -2.28482700 | 5.47072500  | 1.84448500  |
| C | -4.07731900 | 4.39145100  | 2.36860600  |
| H | -4.50425200 | 5.21215600  | 2.93958100  |
| C | -4.76881900 | 3.18825300  | 2.24780100  |
| H | -5.73665800 | 3.06250500  | 2.72597300  |
| C | -4.22765500 | 2.13682200  | 1.51137400  |
| H | -4.78412200 | 1.21082500  | 1.42261600  |
| C | 1.37978100  | 1.71071300  | 1.45937700  |
| C | 0.14735300  | 1.19958900  | 1.91028500  |
| C | -0.43382100 | 1.81389600  | 3.02868600  |
| H | -1.37866100 | 1.44458900  | 3.40886800  |
| C | 0.18349000  | 2.88490700  | 3.67274900  |
| H | -0.29958100 | 3.32717500  | 4.54119500  |
| C | 1.39679500  | 3.39108600  | 3.21227200  |
| H | 1.87660800  | 4.23018600  | 3.70964600  |
| C | 1.98951400  | 2.80262000  | 2.10347900  |
| H | 2.93492200  | 3.18543900  | 1.72698900  |
| C | 2.98407100  | 2.27683500  | -0.88404900 |
| C | 2.28834600  | 3.48668900  | -1.02289900 |
| H | 1.31780600  | 3.61098400  | -0.55315900 |
| C | 2.83608400  | 4.53724400  | -1.75374000 |
| H | 2.28588200  | 5.47015500  | -1.84494800 |
| C | 4.07822100  | 4.39053400  | -2.36886400 |
| H | 4.50532300  | 5.21109100  | -2.93992400 |
| C | 4.76953400  | 3.18723800  | -2.24786400 |
| H | 5.73737500  | 3.06129000  | -2.72598200 |

|    |             |             |             |
|----|-------------|-------------|-------------|
| C  | 4.22817600  | 2.13598800  | -1.51134000 |
| H  | 4.78447700  | 1.20991700  | -1.42242400 |
| C  | 3.66873500  | -0.00189300 | 0.78232800  |
| C  | 4.41272500  | -0.85938900 | -0.04119800 |
| H  | 4.10239100  | -1.02336600 | -1.07020700 |
| C  | 5.53383200  | -1.51388900 | 0.46429200  |
| H  | 6.10495700  | -2.17284600 | -0.18478900 |
| C  | 5.91437200  | -1.33327600 | 1.79340200  |
| H  | 6.78918000  | -1.84649600 | 2.18547500  |
| C  | 5.16391300  | -0.49985800 | 2.62030600  |
| H  | 5.44393200  | -0.36569700 | 3.66206100  |
| C  | 4.04318800  | 0.16134700  | 2.12139200  |
| H  | 3.45466700  | 0.79106300  | 2.78005300  |
| Cl | -2.35761700 | -0.74093300 | 2.97685500  |
| Cl | 2.35755900  | -0.74156600 | -2.97683900 |

### 3f

|    |             |             |             |
|----|-------------|-------------|-------------|
| Pd | -0.83400000 | 0.11546900  | 1.01121600  |
| S  | 0.62121000  | -1.21953000 | 2.36075300  |
| P  | -2.08926400 | 1.59105500  | -0.29600900 |
| N  | 1.48072300  | -3.61676000 | 1.41456000  |
| C  | 1.17530700  | -2.30892700 | 1.14548500  |
| Pd | 0.84918500  | -0.06483400 | -1.00980500 |
| P  | 2.37994100  | 1.12329800  | 0.29207200  |
| S  | -0.85090100 | -1.07224500 | -2.35675500 |
| N  | 1.32757300  | -2.03056000 | -0.15232500 |
| C  | 1.40162300  | -4.27889000 | 2.69648700  |
| H  | 0.79025300  | -3.67137100 | 3.36618400  |
| H  | 2.39757700  | -4.40904100 | 3.13395400  |
| H  | 0.92832500  | -5.25706200 | 2.57103300  |
| N  | -1.71135200 | -1.71249600 | 0.15838400  |
| C  | 1.82284000  | -4.21827600 | 0.21911800  |
| N  | -2.21956700 | -3.21895300 | -1.41215400 |
| C  | 2.19779800  | -5.52864800 | -0.06940800 |
| H  | 2.30192500  | -6.27674900 | 0.71119800  |
| C  | 2.42536800  | -5.83836500 | -1.40623300 |
| H  | 2.71693000  | -6.84959100 | -1.67764400 |
| C  | 2.27747500  | -4.86546900 | -2.40738800 |
| H  | 2.45639300  | -5.13962000 | -3.44391900 |
| C  | 1.91211500  | -3.55577100 | -2.11180300 |
| H  | 1.80845200  | -2.80666600 | -2.88574200 |
| C  | 1.69605100  | -3.22240900 | -0.77117500 |
| C  | -1.62795000 | -2.01402500 | -1.14056400 |
| C  | -2.29633200 | -3.87623300 | -2.69668300 |
| H  | -1.55977300 | -3.42587300 | -3.36463300 |
| H  | -3.29489800 | -3.76840500 | -3.13437900 |
| H  | -2.06452200 | -4.93817100 | -2.57430700 |
| C  | -1.01809000 | 2.30901800  | -1.57147400 |
| C  | 0.21441900  | 1.69815700  | -1.87893400 |
| C  | 0.97704800  | 2.26690000  | -2.90654100 |
| H  | 1.92520800  | 1.81932000  | -3.17728100 |
| C  | 0.53593800  | 3.39034900  | -3.60508500 |
| H  | 1.15951300  | 3.79381700  | -4.39963500 |
| C  | -0.67882600 | 3.99272000  | -3.29141600 |
| H  | -1.02368300 | 4.87104600  | -3.83100100 |
| C  | -1.44909300 | 3.45086300  | -2.27097800 |
| H  | -2.39526100 | 3.91471200  | -2.00375600 |
| C  | -2.80867300 | 3.03309500  | 0.58583500  |
| C  | -4.10868000 | 2.98483700  | 1.10534400  |

|   |             |             |             |
|---|-------------|-------------|-------------|
| H | -4.71382900 | 2.09416400  | 0.98016800  |
| C | -4.63764700 | 4.08080100  | 1.78265800  |
| H | -5.64857900 | 4.02721700  | 2.17784800  |
| C | -3.87807400 | 5.23660000  | 1.95169300  |
| H | -4.29517000 | 6.09237100  | 2.47660800  |
| C | -2.58097500 | 5.29055200  | 1.44464200  |
| H | -1.97835000 | 6.18576700  | 1.57444000  |
| C | -2.04575800 | 4.19475800  | 0.77288500  |
| H | -1.03289300 | 4.24672500  | 0.38702000  |
| C | -3.53042900 | 0.81588300  | -1.13007000 |
| C | -3.82188700 | 1.08652700  | -2.47260800 |
| H | -3.16114200 | 1.71559000  | -3.05993400 |
| C | -4.95131500 | 0.53032100  | -3.06878100 |
| H | -5.16616800 | 0.74567200  | -4.11240900 |
| C | -5.79387900 | -0.30440100 | -2.33631000 |
| H | -6.67411200 | -0.73751800 | -2.80518400 |
| C | -5.49987400 | -0.58735900 | -1.00360300 |
| H | -6.14421500 | -1.24601700 | -0.42705500 |
| C | -4.37099200 | -0.03611100 | -0.39980400 |
| H | -4.13516600 | -0.27329800 | 0.63450900  |
| C | 1.48334000  | 2.05067700  | 1.56655100  |
| C | 0.14969000  | 1.71269500  | 1.87103400  |
| C | -0.48071400 | 2.43279100  | 2.89348300  |
| H | -1.50310800 | 2.19600200  | 3.16018500  |
| C | 0.18480700  | 3.44002700  | 3.59145800  |
| H | -0.34219800 | 3.96793700  | 4.38301400  |
| C | 1.50024100  | 3.77235100  | 3.28124000  |
| H | 2.02025300  | 4.55964400  | 3.82099400  |
| C | 2.14255100  | 3.07865800  | 2.26428800  |
| H | 3.16540000  | 3.33332600  | 1.99849300  |
| C | 3.37980300  | 2.38621900  | -0.59033000 |
| C | 2.86735700  | 3.67738600  | -0.78156900 |
| H | 1.88252600  | 3.93174800  | -0.40352200 |
| C | 3.61725100  | 4.64327700  | -1.44714100 |
| H | 3.20830700  | 5.64155700  | -1.57992200 |
| C | 4.88110600  | 4.32951400  | -1.94376300 |
| H | 5.46636200  | 5.08406000  | -2.46338300 |
| C | 5.39152700  | 3.04451200  | -1.77081200 |
| H | 6.37446400  | 2.78915700  | -2.15768300 |
| C | 4.64780800  | 2.07726600  | -1.09912200 |
| H | 5.06080900  | 1.08345600  | -0.96755500 |
| C | 3.63027100  | 0.06882500  | 1.12758300  |
| C | 3.96602000  | 0.27266900  | 2.47162900  |
| H | 3.44518500  | 1.02225900  | 3.05815200  |
| C | 4.95524500  | -0.50334800 | 3.07105600  |
| H | 5.20511300  | -0.33775100 | 4.11595700  |
| C | 5.61241100  | -1.49183900 | 2.34015700  |
| H | 6.38343700  | -2.09661400 | 2.81133100  |
| C | 5.27168300  | -1.70742500 | 1.00592800  |
| H | 5.76982100  | -2.48357900 | 0.43068100  |
| C | 4.28177400  | -0.93656900 | 0.39889100  |
| H | 4.00652700  | -1.11902600 | -0.63679000 |
| C | -2.33471800 | -2.79427300 | 0.77547200  |
| C | -2.68464400 | -3.73267600 | -0.21738300 |
| C | -3.34178700 | -4.92730400 | 0.06815400  |
| H | -3.61338200 | -5.62942300 | -0.71495400 |
| C | -3.62692200 | -5.18485700 | 1.40506600  |
| H | -4.13588800 | -6.10664500 | 1.67428500  |
| C | -3.26090700 | -4.27428300 | 2.40884300  |
| H | -3.49178600 | -4.50649700 | 3.44533700  |

|    |             |             |             |
|----|-------------|-------------|-------------|
| C  | -2.61425700 | -3.07732000 | 2.11589700  |
| H  | -2.34325600 | -2.37382200 | 2.89219400  |
| Cl | 2.63270200  | -0.40997800 | -2.71016900 |
| Cl | -2.64560200 | 0.14595500  | 2.71350200  |

### 3g

|    |             |             |             |
|----|-------------|-------------|-------------|
| Pd | -0.86353800 | 0.00422700  | 0.98380300  |
| S  | 0.70707200  | -1.14230100 | 2.36275400  |
| P  | -2.25056300 | 1.34489700  | -0.34357600 |
| C  | 1.43767800  | -2.17351500 | 1.19920800  |
| Pd | 0.86351800  | 0.00406500  | -0.98379400 |
| P  | 2.25068300  | 1.34462700  | 0.34347700  |
| S  | -0.70726400 | -1.14227100 | -2.36278000 |
| N  | 1.52785900  | -1.97136500 | -0.10131000 |
| N  | -1.52818800 | -1.97123100 | 0.10124600  |
| C  | 2.50926200  | -4.10563800 | 0.10861400  |
| C  | 3.10103300  | -5.27713100 | -0.36085400 |
| H  | 3.42755700  | -6.04941100 | 0.32964400  |
| C  | 3.23835400  | -5.43636400 | -1.73418500 |
| H  | 3.68966600  | -6.34328300 | -2.12762100 |
| C  | 2.77891300  | -4.44461500 | -2.60993500 |
| H  | 2.87290500  | -4.59044100 | -3.68258500 |
| C  | 2.19960300  | -3.27280100 | -2.14064300 |
| H  | 1.84957900  | -2.51249800 | -2.82469500 |
| C  | 2.07830900  | -3.07871000 | -0.75900900 |
| C  | -1.43791900 | -2.17343900 | -1.19924200 |
| C  | -1.22846700 | 2.16965400  | -1.59257000 |
| C  | 0.07045600  | 1.69619500  | -1.86387400 |
| C  | 0.80186800  | 2.34463100  | -2.86585800 |
| H  | 1.80049900  | 2.00392700  | -3.10736800 |
| C  | 0.26392300  | 3.41662000  | -3.57796800 |
| H  | 0.86545800  | 3.88552500  | -4.35316700 |
| C  | -1.01697600 | 3.88459200  | -3.30265800 |
| H  | -1.43722600 | 4.72170100  | -3.85394800 |
| C  | -1.75529600 | 3.26163000  | -2.30527400 |
| H  | -2.75226400 | 3.62297100  | -2.06614700 |
| C  | -3.12658100 | 2.70783700  | 0.52079800  |
| C  | -4.42597900 | 2.52910800  | 1.01289500  |
| H  | -4.93472200 | 1.58107600  | 0.87953900  |
| C  | -5.07861200 | 3.56826500  | 1.67142700  |
| H  | -6.08733600 | 3.41336700  | 2.04481400  |
| C  | -4.44519400 | 4.79670600  | 1.84853600  |
| H  | -4.95933100 | 5.60781300  | 2.35795500  |
| C  | -3.14985700 | 4.98078000  | 1.36868000  |
| H  | -2.64518700 | 5.93383100  | 1.50429400  |
| C  | -2.49083500 | 3.94234300  | 0.71611000  |
| H  | -1.48023700 | 4.09677000  | 0.35228200  |
| C  | -3.58684900 | 0.42828900  | -1.20628100 |
| C  | -3.87829200 | 0.67254300  | -2.55416000 |
| H  | -3.27274600 | 1.36536800  | -3.12907400 |
| C  | -4.93453700 | 0.00753700  | -3.17187500 |
| H  | -5.14853100 | 0.20078800  | -4.21985500 |
| C  | -5.70351500 | -0.90841700 | -2.45583900 |
| H  | -6.52454300 | -1.42864600 | -2.94270400 |
| C  | -5.40848400 | -1.16407800 | -1.11815100 |
| H  | -5.99376700 | -1.88654100 | -0.55549600 |
| C  | -4.35158300 | -0.50524400 | -0.49245900 |
| H  | -4.11326200 | -0.71911200 | 0.54630500  |
| C  | 1.22869800  | 2.16954900  | 1.59246400  |

|    |             |             |             |
|----|-------------|-------------|-------------|
| C  | -0.07030100 | 1.69631800  | 1.86380400  |
| C  | -0.80168000 | 2.34500000  | 2.86564200  |
| H  | -1.80039700 | 2.00452300  | 3.10710100  |
| C  | -0.26359100 | 3.41697900  | 3.57766900  |
| H  | -0.86510100 | 3.88607700  | 4.35277100  |
| C  | 1.01741300  | 3.88467100  | 3.30240200  |
| H  | 1.43778200  | 4.72177100  | 3.85361600  |
| C  | 1.75567200  | 3.26149200  | 2.30510500  |
| H  | 2.75271000  | 3.62264000  | 2.06601600  |
| C  | 3.12691400  | 2.70746800  | -0.52082300 |
| C  | 2.49116300  | 3.94192800  | -0.71642200 |
| H  | 1.48046600  | 4.09635700  | -0.35286400 |
| C  | 3.15031600  | 4.98032700  | -1.36892100 |
| H  | 2.64564500  | 5.93334600  | -1.50476900 |
| C  | 4.44578500  | 4.79625000  | -1.84841500 |
| H  | 4.96003000  | 5.60731900  | -2.35778300 |
| C  | 5.07920500  | 3.56784900  | -1.67102700 |
| H  | 6.08803700  | 3.41296400  | -2.04412700 |
| C  | 4.42643800  | 2.52872500  | -1.01257900 |
| H  | 4.93515000  | 1.58070100  | -0.87899700 |
| C  | 3.58680100  | 0.42785000  | 1.20632700  |
| C  | 3.87807000  | 0.67205200  | 2.55425700  |
| H  | 3.27247800  | 1.36492000  | 3.12908300  |
| C  | 4.93416200  | 0.00694800  | 3.17212100  |
| H  | 5.14804400  | 0.20016400  | 4.22012900  |
| C  | 5.70316200  | -0.90905800 | 2.45617400  |
| H  | 6.52406700  | -1.42938000 | 2.94315200  |
| C  | 5.40829400  | -1.16468600 | 1.11844800  |
| H  | 5.99360400  | -1.88719300 | 0.55588000  |
| C  | 4.35154100  | -0.50575700 | 0.49260400  |
| H  | 4.11332600  | -0.71959300 | -0.54618600 |
| C  | -2.07867800 | -3.07856300 | 0.75896400  |
| C  | -2.50966100 | -4.10549200 | -0.10864800 |
| C  | -3.10154700 | -5.27693000 | 0.36080600  |
| H  | -3.42810300 | -6.04918300 | -0.32970600 |
| C  | -3.23895200 | -5.43613400 | 1.73413400  |
| H  | -3.69037800 | -6.34300000 | 2.12756400  |
| C  | -2.77943700 | -4.44441700 | 2.60988000  |
| H  | -2.87345300 | -4.59021900 | 3.68253200  |
| C  | -2.20001500 | -3.27265700 | 2.14058900  |
| H  | -1.84986800 | -2.51243400 | 2.82465800  |
| S  | -2.11998300 | -3.69089100 | -1.75450600 |
| S  | 2.11971100  | -3.69092000 | 1.75445800  |
| Cl | 2.71601100  | -0.13909500 | -2.63329300 |
| Cl | -2.71559200 | -0.13889900 | 2.63344000  |

### 3h

|    |             |             |             |
|----|-------------|-------------|-------------|
| Pd | 0.75054200  | -0.45890200 | -1.10120500 |
| S  | -0.83964200 | -1.77241900 | -2.34928100 |
| P  | 2.22731400  | 0.90473700  | 0.06815800  |
| N  | 1.55388500  | -2.28372400 | -0.25343000 |
| C  | -1.51238800 | -2.63902100 | -1.03718200 |
| Pd | -0.75051000 | -0.45866800 | 1.10123500  |
| P  | -2.22704000 | 0.90519000  | -0.06817000 |
| S  | 0.83955500  | -1.77240700 | 2.34929400  |
| N  | -1.55424600 | -2.28335500 | 0.25344600  |
| C  | 1.51171300  | -2.63944700 | 1.03717100  |
| N  | 2.13508200  | -3.28335100 | -0.94584500 |
| C  | 2.29939400  | -4.70614200 | 2.24535700  |

|   |             |             |             |
|---|-------------|-------------|-------------|
| H | 1.37982000  | -4.74134800 | 2.83546300  |
| H | 3.11443000  | -4.31995200 | 2.86419600  |
| H | 2.55169200  | -5.70072100 | 1.87677300  |
| N | 2.47362800  | -4.22771400 | -0.15059800 |
| C | -2.30164800 | -4.70503000 | -2.24548800 |
| H | -1.38230600 | -4.74060400 | -2.83592800 |
| H | -3.11669800 | -4.31825000 | -2.86394200 |
| H | -2.55433500 | -5.69955600 | -1.87703300 |
| N | 2.09190900  | -3.85560200 | 1.09587500  |
| N | -2.13615300 | -3.28259300 | 0.94581900  |
| N | -2.47524500 | -4.22674800 | 0.15056000  |
| N | -2.09329100 | -3.85483800 | -1.09591100 |
| C | 1.37563300  | 1.71559900  | 1.44605300  |
| C | 0.15055800  | 1.20013600  | 1.91139700  |
| C | -0.42449500 | 1.80943300  | 3.03449400  |
| H | -1.36331500 | 1.43321800  | 3.42292400  |
| C | 0.19397700  | 2.88439800  | 3.67106600  |
| H | -0.28256300 | 3.32374300  | 4.54439700  |
| C | 1.39938500  | 3.39727000  | 3.19780000  |
| H | 1.87905400  | 4.23954800  | 3.68963200  |
| C | 1.98511700  | 2.81148900  | 2.08396700  |
| H | 2.92470700  | 3.19892700  | 1.69812000  |
| C | 3.64608000  | -0.02095900 | 0.77505700  |
| C | 4.02598800  | 0.15510300  | 2.11152700  |
| H | 3.45286600  | 0.80667700  | 2.76254200  |
| C | 5.13369500  | -0.52186000 | 2.61813500  |
| H | 5.41872000  | -0.37763000 | 3.65709900  |
| C | 5.86413500  | -1.38401500 | 1.80260900  |
| H | 6.72747700  | -1.91100400 | 2.20140800  |
| C | 5.47806500  | -1.57650500 | 0.47665000  |
| H | 6.03134600  | -2.25884100 | -0.16316800 |
| C | 4.37152200  | -0.90472200 | -0.03846700 |
| H | 4.05766600  | -1.07911000 | -1.06508800 |
| C | 2.98466900  | 2.26423800  | -0.90316800 |
| C | 4.22526800  | 2.10254000  | -1.53257400 |
| H | 4.76649200  | 1.16754600  | -1.44428600 |
| C | 4.77911000  | 3.14433800  | -2.27277700 |
| H | 5.74345400  | 3.00371100  | -2.75352200 |
| C | 4.10360600  | 4.35658200  | -2.39531400 |
| H | 4.54066900  | 5.16940200  | -2.96974100 |
| C | 2.86472300  | 4.52284400  | -1.77846400 |
| H | 2.32780000  | 5.46321100  | -1.87140500 |
| C | 2.30392800  | 3.48232500  | -1.04320700 |
| H | 1.33610400  | 3.62131100  | -0.57185000 |
| C | -1.37526400 | 1.71575200  | -1.44616800 |
| C | -0.15028700 | 1.19999600  | -1.91144900 |
| C | 0.42487100  | 1.80906100  | -3.03462400 |
| H | 1.36361600  | 1.43262800  | -3.42302700 |
| C | -0.19339600 | 2.88407900  | -3.67131000 |
| H | 0.28323800  | 3.32324200  | -4.54468100 |
| C | -1.39870100 | 3.39723600  | -3.19809400 |
| H | -1.87821900 | 4.23955100  | -3.69000900 |
| C | -1.98453700 | 2.81169100  | -2.08419200 |
| H | -2.92404200 | 3.19936400  | -1.69837800 |
| C | -2.98412300 | 2.26491900  | 0.90303400  |
| C | -4.22469800 | 2.10355100  | 1.53256000  |
| H | -4.76611100 | 1.16864700  | 1.44445900  |
| C | -4.77829800 | 3.14557000  | 2.27264100  |
| H | -5.74263300 | 3.00518800  | 2.75347600  |
| C | -4.10257300 | 4.35771200  | 2.39492600  |

|    |             |             |             |
|----|-------------|-------------|-------------|
| H  | -4.53944900 | 5.17070300  | 2.96925300  |
| C  | -2.86370600 | 4.52365500  | 1.77794900  |
| H  | -2.32660900 | 5.46394200  | 1.87069800  |
| C  | -2.30315100 | 3.48291800  | 1.04282500  |
| H  | -1.33533900 | 3.62165200  | 0.57137400  |
| C  | -3.64601600 | -0.02034600 | -0.77487000 |
| C  | -4.02592300 | 0.15542300  | -2.11137700 |
| H  | -3.45270100 | 0.80671900  | -2.76257600 |
| C  | -5.13377300 | -0.52147500 | -2.61775900 |
| H  | -5.41881200 | -0.37747800 | -3.65675100 |
| C  | -5.86435600 | -1.38326900 | -1.80197500 |
| H  | -6.72780800 | -1.91019800 | -2.20061600 |
| C  | -5.47827800 | -1.57548400 | -0.47597800 |
| H  | -6.03165300 | -2.25755100 | 0.16404500  |
| C  | -4.37158700 | -0.90376700 | 0.03891200  |
| H  | -4.05769700 | -1.07798900 | 1.06555300  |
| Cl | -2.36143300 | -0.71737900 | 2.94646100  |
| Cl | 2.36158200  | -0.71800500 | -2.94636800 |
